# Supplementary material for: Identification of Reference Genes for RT-qPCR Data Normalization in Cannabis sativa Stem Tissues
Source: PubMed Central journal article supplement (PMC5037828; doi:10.3390/ijms17091556), 2016-09-15
Supplement: ijms-17-01556-s001.pdf [file ijms-17-01556-s001.pdf]

# Supplementary Materials: Identification of Reference Genes for RT-qPCR Data Normalization in *Cannabis sativa* Stem Tissues

Lauralie Mangeot-Peter, Sylvain Legay, Jean-Francois Hausman, Sergio Esposito and Gea Guerriero

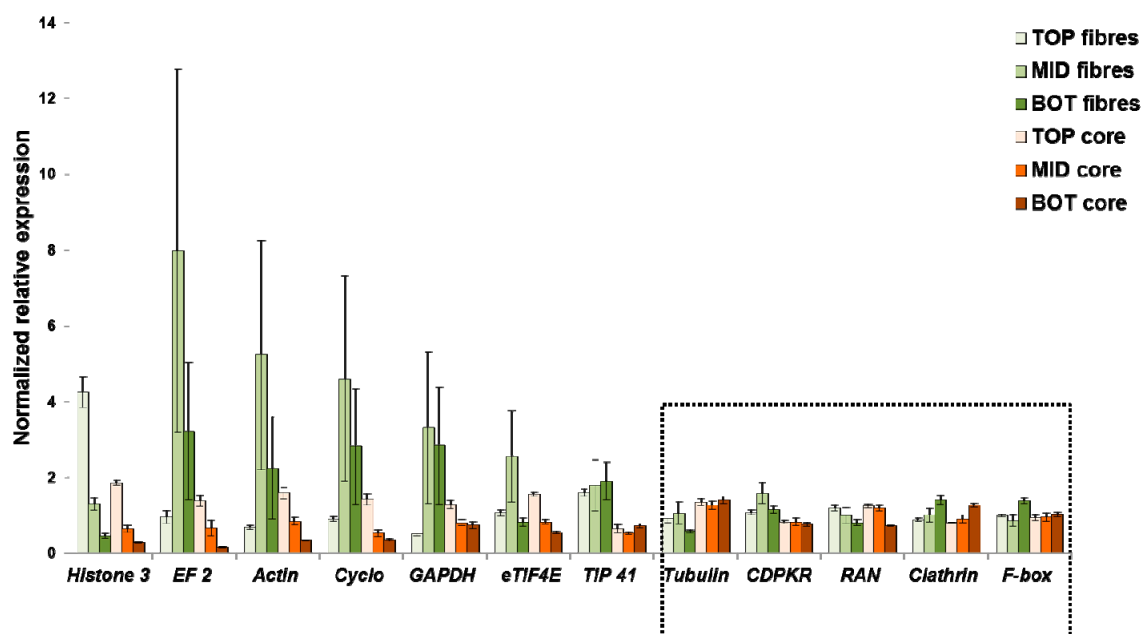

**Figure S1.** Expression of the different reference genes in hemp stem tissues. Error bars indicate the standard error of the mean ( $n = 4$ ). The boxed genes correspond to those necessary for normalization when both types of hemp stem tissues are considered, according to geNorm<sup>PLUS</sup>.

**Table S1.** Hemp reference and target genes analyzed in this study with relative accession numbers at the Medicinal Plant Genome Resource.

| Gene Name       | Locus Number                         |
|-----------------|--------------------------------------|
| <i>Histone3</i> | csa_locus_1853_iso_4_len_1208_ver_2  |
| <i>EF2</i>      | csa_locus_674_iso_1_len_2081_ver_2   |
| <i>Actin</i>    | csa_locus_2263_iso_5_len_1488_ver_2  |
| <i>Cyclo</i>    | csa_locus_6842_iso_2_len_854_ver_2   |
| <i>GAPDH</i>    | csa_locus_1460_iso_2_len_1872_ver_2  |
| <i>eTIF4E</i>   | csa_locus_9035_iso_2_len_909_ver_2   |
| <i>TIP41</i>    | csa_locus_3380_iso_1_len_1164_ver_2  |
| <i>Tubulin</i>  | csa_locus_11261_iso_1_len_1086_ver_2 |
| <i>CDPK</i>     | csa_locus_8286_iso_2_len_2019_ver_2  |
| <i>RAN</i>      | csa_locus_1455_iso_4_len_1015_ver_2  |
| <i>Clathrin</i> | csa_locus_5464_iso_6_len_1880_ver_2  |
| <i>F-box</i>    | csa_locus_16122_iso_2_len_2075_ver_2 |
| <i>TRA1</i>     | csa_locus_4950_iso_5_len_1428_ver_2  |
| <i>TRA2</i>     | csa_locus_5284_iso_4_len_790_ver_2   |
| <i>DHS1</i>     | csa_locus_3880_iso_9_len_1916_ver_2  |
| <i>DHS2</i>     | csa_locus_1565_iso_10_len_932_ver_2  |

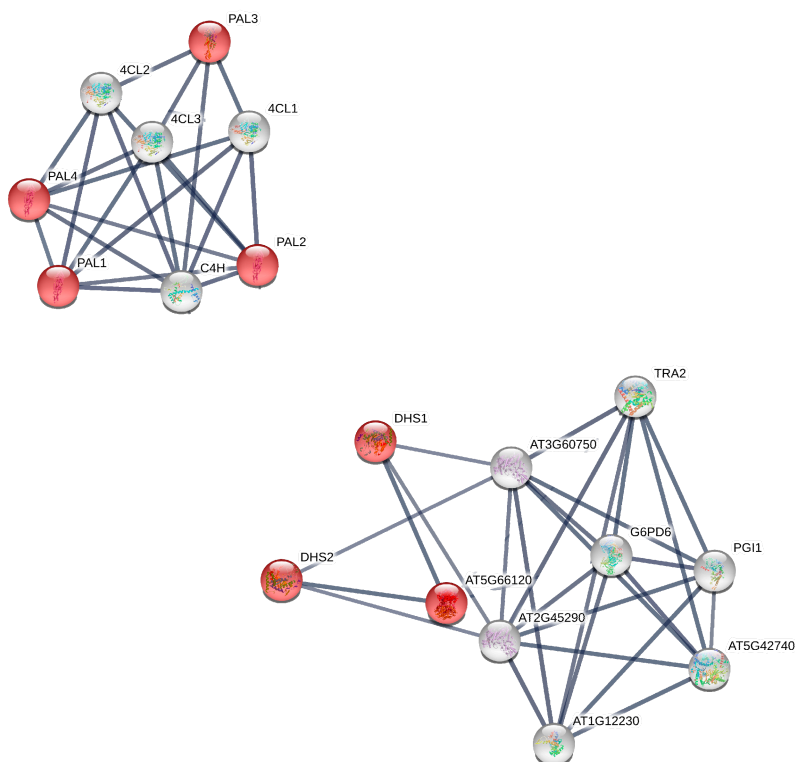

**Figure S2.** STRING network (<http://string-db.org/>) with medium confidence interaction score (0.400). The aromatic amino acid metabolic process is highlighted in red. The thicker lines correspond to an edge confidence  $>0.900$ , the thinner lines are  $>0.400$ . PAL: phenylalanine ammonia lyase; 4CL: 4-coumarate: 4-coumarate-CoA ligase; C4H: cinnamate 4-hydroxylase; PGI and AT5G42740: glucose-6-phosphate isomerases; G6PD: glucose-6-phosphate dehydrogenase; AT3G60750 and AT2G45290: transketolases.

**HISTONE3**

```

Marijuana-C32096195
L.usitatissimum-LUS10013948
Textile-hemp-csa_locus_1853_iso_4_len_1208_ver_2
H.lupulus-HL.SW.V1.0.G020502.1
-----
ATGAAGGATCCTTCTGTCCACCTCATCCATCCGCTCCATTACCAATCCCACCGTTGAT
-----

Marijuana-C32096195
L.usitatissimum-LUS10013948
Textile-hemp-csa_locus_1853_iso_4_len_1208_ver_2
H.lupulus-HL.SW.V1.0.G020502.1
-----
ATCCCTCCACCATCCAACCGCCACAATCTCTCTCTACCGCAATAAAATCCCACCATTT
-----TT
-----

Marijuana-C32096195
L.usitatissimum-LUS10013948
Textile-hemp-csa_locus_1853_iso_4_len_1208_ver_2
H.lupulus-HL.SW.V1.0.G020502.1
-----
TCTTCACCGTTTCATCATCATCAGTACCAACATCAGCTCAGAATCCCAATCTACCGATT
TCTC--AA--GCTTCTCAAGAACAAACAAA--CAGA-----CAAACACAG
-----

Marijuana-C32096195
L.usitatissimum-LUS10013948
Textile-hemp-csa_locus_1853_iso_4_len_1208_ver_2
H.lupulus-HL.SW.V1.0.G020502.1
-----
CCCTACTCCTCCCTCTCTCATTCAATGGCTCGCACCAAGCAAACAGCTCGCAAGTCCACC
CAAAGAACTAAGCTTTCTCAATCAATGGCTCGTACCAAGCAGACTGCTCGCAATCGACC
-----ATGGCTCGTACCAAGCAAACCTGCTCGCAAGTCCGACC
-----

Marijuana-C32096195
L.usitatissimum-LUS10013948
Textile-hemp-csa_locus_1853_iso_4_len_1208_ver_2
H.lupulus-HL.SW.V1.0.G020502.1
-----
GGAGGCAAGGCCCAAGGAAGCAGCTGGCCACCAAGGCAGCAAGGAAGTCCAGCTCCGGCC
GGAGGCAAGGCCCAAGGAAGCAGCTGGCGACTAAGGCGGCAAGGAAGTCCGCTCCAGCG
GGAGGCAAGGCCCAAGGAAGCACTGGCAACCAAGGCCGCAAGGAAGTCTCGCCGGCC
-----

Marijuana-C32096195
L.usitatissimum-LUS10013948
Textile-hemp-csa_locus_1853_iso_4_len_1208_ver_2
H.lupulus-HL.SW.V1.0.G020502.1
-----
ACCGGAGGAGTGAAGAAGCCCCACAGATTCAGGCCGGGAACCGTCTCTCGGTGAGATA
ACAGGAGGTTGAAGAAGCCTCATCGGTTCAAGCCAGGAAGTGTGCTCTGAGAGAGATC
ACCGTGTGTTGAAGAAGCCTCATCGGTTCAAGCCGGAAGTGTGCTCTGAGGAGATC
-----

Marijuana-C32096195
L.usitatissimum-LUS10013948
Textile-hemp-csa_locus_1853_iso_4_len_1208_ver_2
H.lupulus-HL.SW.V1.0.G020502.1
-----
CGCAAGTACCAGAAGAGCACCAGCTTCTGATCCGAAAGCTTCCCTTTCAGCGCTCGTT
AGAAATACCAGAAGAGCAGCTGAGCTTCTCATCAGGAAGTTCCTTTCCAGAGGCTTCTC
AGGAAGTATCAGAAGAGCAGCTGAGCTTCTGATCAGGAAGTTCCTTTCCAGAGGCTTCTC
-----

Marijuana-C32096195
L.usitatissimum-LUS10013948
Textile-hemp-csa_locus_1853_iso_4_len_1208_ver_2
H.lupulus-HL.SW.V1.0.G020502.1
-----
CGTGAGATCGCCAGGATTTCAAGACAGATCTCAGGTTCCAGAGCTCCGAGTGTCTGCT
AGGGAAATCGCTCAAGATTTCAAGACTGATCTTGTTCAGAGCAGCGCCGCTCTCCGCT
AGGGAGATCGCTCAGGATTTCAAGACTGATCTTGTTCAGAGCAGCGCCGCTCTCCGCT
-----

Marijuana-C32096195
L.usitatissimum-LUS10013948
Textile-hemp-csa locus 1853 iso 4 len 1208 ver 2
H.lupulus-HL.SW.V1.0.G020502.1
-----
CTACAGGAGGCGAGCCGAGGCTATCTCGTCCGACTGTTTCGAGGATACTAACCTCTGCGCC
CTTCAAGAGGCGCGGAGGCTACTTGTGGTGTGTTTGGAGACATAACCTCTGTCGCC
CTTCAGGAGGCGCGGAGGCTACTTGTGGTCCGACTTTCAGGACCAACCTCTGCGCC
-----

Marijuana-C32096195
L.usitatissimum-LUS10013948
Textile-hemp-csa_locus_1853_iso_4_len_1208_ver_2
H.lupulus-HL.SW.V1.0.G020502.1
-----
-----CAGTAGCTCGAAGAATCAGG
ATCCACGCGCAAGAGGGTTACTATCATGCCAAGGACATCCAGCTCGCAAGCAGGATCAGA
ATTTCAGGAGGAGTCACTATCATGCCTAAAGATATCCAGTAGCTCGAAGAATCAGG
ATTTCAGGAGGAGGTTACCATCATGCCTAAAGATATTCAGCTTGTCTCGAAGAATCAGG
***** **: **.****.
-----

Marijuana-C32096195
L.usitatissimum-LUS10013948
Textile-hemp-csa_locus_1853_iso_4_len_1208_ver_2
H.lupulus-HL.SW.V1.0.G020502.1
-----
GGAGAGAGAGCTTAAGAAATGTAAACCTTCTTTATTTAATTAGGATCTTTACCAATAAC
GGCGAGCGGCTTAG-----
GGAGAGAGAGCTTAAGAAATGTAAACCTTCTTTATTTAATTAGGATCTTTACCAATAAC
GGCGAGAGAGCTTAA-----
**.*.*.*.****.
-----

Marijuana-C32096195
L.usitatissimum-LUS10013948
Textile-hemp-csa_locus_1853_iso_4_len_1208_ver_2
H.lupulus-HL.SW.V1.0.G020502.1
-----
TT-----AGTAATCCAAGTAATATCTGTTGAAAACGAGTTTATA
-----
TTAAATCATAGGCTTGTGGAAGTAATCCAAGTAATATATGTTGAAAACGAGTTTATA
-----

Marijuana-C32096195
L.usitatissimum-LUS10013948
Textile-hemp-csa_locus_1853_iso_4_len_1208_ver_2
H.lupulus-HL.SW.V1.0.G020502.1
-----
GTGATACATTAGGTTAGTAAATGAGTCGAGTTCATTGTGAGAGGTTTCTCTAAATCT
-----
GTGATACATCAAGTTAGTAAATGAGTCGAGTTCATTGTGAGAGGTTTCTCTAAATCT
-----

Marijuana-C32096195
L.usitatissimum-LUS10013948
Textile-hemp-csa_locus_1853_iso_4_len_1208_ver_2
H.lupulus-HL.SW.V1.0.G020502.1
-----
ATCTTGTGTTCTTCAACAAATCTATAGAATCATGGTACGCCAGGATCAAGGTTTATGTC
-----
ATCTTGTGTTCTTCAACAAATCTATAGAATCATGGTACGCCAGGATCAAGGTTTATGTT
-----

Marijuana-C32096195
L.usitatissimum-LUS10013948
Textile-hemp-csa_locus_1853_iso_4_len_1208_ver_2
H.lupulus-HL.SW.V1.0.G020502.1
-----
GAAATCACTGAAATTAATTTGCAAACTACCGATGTTTCGCCGCTGAGATCGGGAAGTT
-----
GAAATTAAGTAAATTAATTTGCCAAACCACTGATGTTTCGCCGCTGAGATCGGGAAGTT
-----

Marijuana-C32096195
L.usitatissimum-LUS10013948
Textile-hemp-csa_locus_1853_iso_4_len_1208_ver_2
H.lupulus-HL.SW.V1.0.G020502.1
-----
ACCGTCCGAATTAGTGAGGTTGAGACCCATTGGGAAGAATGTGATATCTGAATCTCA
-----
ACCGTCCGAATTAGTGAGGTTGAGACCCATTGGGAAGAATGTGATATCTGAATCTCA
-----

Marijuana-C32096195
L.usitatissimum-LUS10013948
Textile-hemp-csa_locus_1853_iso_4_len_1208_ver_2
H.lupulus-HL.SW.V1.0.G020502.1
-----
TCCAATT-----GTGACGGTAACCTTCTGATCTTGGCGCGAAA
-----
TCCAATTGGGTTCCACCTCACTGGTGTGACGGTAACCTTCTGATCTGCGCGCGAAA
-----

```

```
Marijuana-C32096195
L.usitatissimum-LUS10013948
Textile-hemp-csa_locus_1853_iso_4_len_1208_ver_2
H.lupulus-HL.SW.V1.0.G020502.1
-----
CATCGGTGGTTTGA AAAATTTAATTTTCAGTGATTTTCGATATAAACTATGATCGGTGTCCAC
-----
-----
CATCGGTGGTTTGA AAAATTTAATTTTCAGTAATTTTGATATAAACTATGATCGGTGTCTAC
-----
-----

Marijuana-C32096195
L.usitatissimum-LUS10013948
Textile-hemp-csa_locus_1853_iso_4_len_1208_ver_2
H.lupulus-HL.SW.V1.0.G020502.1
-----
ATGATTTCTATAGATTTGTTGAAGAAATAGGGGATAGATTTTCGAGATAAACCTCCCCCAGC
-----
-----
ATGATTTCTATAGATTTGTTGAAGAAATAGGAGATAGATTTTCGAGATAAACCTCCCCCAGC
-----
-----

Marijuana-C32096195
L.usitatissimum-LUS10013948
Textile-hemp-csa_locus_1853_iso_4_len_1208_ver_2
H.lupulus-HL.SW.V1.0.G020502.1
-----
GAATCAACTTGACTCATTTTGTAACTGATGTATCACTATAGGCTCGTTTTCAACAGCA
-----
-----
GAATCAACTTGGCTCATTTTGTAACTGATGTATCACTATAGGCTCGTTTTCAACAGCA
-----
-----

Marijuana-C32096195
L.usitatissimum-LUS10013948
Textile-hemp-csa_locus_1853_iso_4_len_1208_ver_2
H.lupulus-HL.SW.V1.0.G020502.1
-----
ATATTACATGATTATTTTTTACAGCGCCTATGATTTGGGTATTTGGTCGGTGTCTTGT
-----
-----
ATATTACATGATT-----ATTGCGCCTATGATTTGGGTATTTGGTCGGTGTCTTGT
-----
-----

Marijuana-C32096195
L.usitatissimum-LUS10013948
Textile-hemp-csa_locus_1853_iso_4_len_1208_ver_2
H.lupulus-HL.SW.V1.0.G020502.1
-----
CTGTTTTTGTATCCCTTTGTGGCAATAGTTGTTTCATATCTGTTTAAAAATCTAATGAGAA
-----
-----
CTGTTTTTGTATCCCTTTGTGGCAATAGTTGTTTCATATCTGTTTAAAAATCTAATGAGAA
-----
-----

Marijuana-C32096195
L.usitatissimum-LUS10013948
Textile-hemp-csa_locus_1853_iso_4_len_1208_ver_2
H.lupulus-HL.SW.V1.0.G020502.1
-----
TGTTAGTTATAGCTATTAAGCTTCAAATCATATCTGTTTGGTTAGCAGCTCTACTTAAA
-----
-----
TGTTAGTTATAGCTATTAAGCTTCAAAAAA-----
-----

Marijuana-C32096195
L.usitatissimum-LUS10013948
Textile-hemp-csa_locus_1853_iso_4_len_1208_ver_2
H.lupulus-HL.SW.V1.0.G020502.1
-----
CAAATACATTTTAAACCTAATATTTGTTGGTAATCAAACGACAATTGAGCTTTTATGAGA
-----
-----
-----

Marijuana-C32096195
L.usitatissimum-LUS10013948
Textile-hemp-csa_locus_1853_iso_4_len_1208_ver_2
H.lupulus-HL.SW.V1.0.G020502.1
-----
TTCTGGC
-----
-----
-----
```



Textile-hemp-csa\_locus\_674\_iso\_1\_len\_2081\_ver\_2
Marijuana-C32108059
L.usitatissimum-Lus10031201
H.lupulus-HL.SW.v1.0.G039978.1

Textile-hemp-csa\_locus\_674\_iso\_1\_len\_2081\_ver\_2
Marijuana-C32108059
L.usitatissimum-Lus10031201

AGTTGATGGGGAAGCTTACCAAACCTTCCAGAGAGTTATTGAGAATGCTAATGTGAT
AGTTGATGGGGAAGCTTACCAAACCTTCCAGAGAGTTATTGAGAATGCTAATGTGAT
AGTGGATGGGGAAGCTTACCAAACCTTCCAGAGAGTTATTGAGAATGCTAATGTGAT
GGTTGATGGGGAAGCTTACCAAACCTTCCAGAGAGTTATTGAGAATGCTAATGTGAT
\*\* \*\* \*\* \*\* \*\* \*\* \*\* \*\* \*\* \*\* \*\* \*\* \*\* \*\* \*\* \*\* \*\* \*\* \*\* \*\* \*\* \*\* \*\* \*\* \*\* \*\* \*\* \*\* \*\* \*\* \*\* \*\* \*\* \*\* \*\* \*\* \*\* \*\* \*\* \*\* \*\* \*\* \*\* \*\* \*\* \*\* \*\* \*\*

TATGGCTACCTATGAAGATCCTCTTCTGGTGTATGTTCCAGGTCTATCCTGAGAAGGCAC
TATGGCTACCTATGAAGATCCTCTTCTGGTGTATGTTCCAGGTCTATCCTGAGAAGGCAC
CATGGCAACCTATGAAGATCCTCTTCTGGTGTATGTTCCAGGTCTATCCTGAGAAGGCAC
TATGGCTACCTATGAAGATCCTCTTCTGGTGTATGTTCCAGGTCTATCCTGAGAAGGCAC
\*\*\*\*\*

TGTAGCTTTCTCTGCTGGTTTGCATGGTTGGGCTTTTACTCTGACTAAGTTTCCCAAGAT
TGTAGCTTTCTCTGCTGGTTTGCATGGTTGGGCTTTTACTCTGACTAAGTTTCCCAAGAT
TGTGCTTTTCCGCTGGTCTGATGGATGGGCTTTTACTCTGACTAAGTTTCCCAAGAT
AGTATGCTTTCTCTGCTGGTTTGCATGGTTGGGCTTTTACTCTGACTAAGTTTCCCAAGAT
:\*\*\* \*\* \*\* \*\* \*\* \*\* \*\* \*\* \*\* \*\* \*\* \*\* \*\* \*\* \*\* \*\* \*\* \*\* \*\* \*\* \* \*\* \*\* \*\* \*\* \*\* \*\* \*\* \*\* \*\* \*\* \* \*\* \*\* \*\* \* \*\*

GTATGCCTCCAAGTTTGGTGTGATGAGTCAAAGATGATGGAGCGTCTCTGGGGTGAAAA
GTATGCCTCCAAGTTTGGTGTGATGAGTCAAAGATGATGGAGCGTCTCTGGGGTGAAAA
GTATGCCTCCAAGTTTGGTGTGATGAGTCAAAGATGATGGAGCGTCTCTGGGGTGAAAA
GTATGCCTCCAAGTTTGGTGTGATGAGTCAAAGATGATGGAGCGTCTCTGGGGTGAAAA
\*\*\*\*\* \*\* \*\* \*\* \*\* \* \*\* \*\* \* \*\* \*\* \*\* \* \*\* \*\* \*\* \* \*\* \*\* \*\* \* \*\*

CTTCTTTGATCCTGCTACTAAAAATGGACCACCAAGAACTAGGATCTCCTACTTGCAC
CTTCTTTGATCCTGCTACTAAAAATGGACCACCAAGAACTAGGATCTCCTACTTGCAC
TTTCTTTGACCTGCCACTAAGAAATGGACCACCAAGAACTAGGATCTCCTACTTGCAC
CTTCTTTGATCCTGCTACTAAAAATGGACCACCAAGAACTAGGATCTCCTACTTGCAC
\*\*\*\*\* \*\* \*\* \*\* \* \*\* \*\* \* \*\* \*\* \*\* \* \*\* \*\* \* \*\* \*\* \* \*\* \*\*

CGGTGGTTTGTGTTTGTCTGTTATGAACCTATCAAGCAGATTATTAGCTCTTGTATGAA
CGGTGGTTTGTGTTTGTCTGTTATGAACCTATCAAGCAGATTATTAGCTCTTGTATGAA
CGGTGGTTTGTGCTGTTCTGTTACGAGCCGATCAAGCAGATCATCAACCTCTGATGAC
CGGTGGTTTGTGTTTGTCTGTTATGAACCTATCAAGCAGATTATTAGCTCTTGTATGAA
\*\*\*\*\* \*\* \*\* \*\* \* \*\* \*\* \* \*\* \*\* \*\* \* \*\* \*\* \* \*\* \*\* \* \*\* \*\*

TGACCAAAGGATAAGTTGTGGCCAATGCTACAGAGCTTAATGTCACCATGAAGTCTGA
TGACCAAAGGATAAGTTGTGGCCAATGCTACAGAGCTTAATGTCACCATGAAGTCTGA
CGACCAAGGAGGACAACTGTGGCCATGTTGAAAAAACAATGTTTCAATGAAGGGTGA
TGACCAAAGGATAAGCTGTGGCCTATGCTACAGAGCTAGGTGTCACCATGAAGTCTGA
\*\*\*\*\* \*\* \*\* \* \*\* \*\* \* \*\* \*\* \* \*\* \*\* \* \*\* \*\* \* \*\* \*\* \* \*\*

TGAGAAAGAACTGTTGGGAAAGGCATTGATGAAGCGTGTATGCAAAATGCGCTTCTGTC
TGAGAAAGAACTGTTGGGAAAGGCATTGATGAAGCGTGTATGCAAAATGCGCTTCTGTC
AGAGAAAGACTTAATGGCAAGGCTTGTGATGAAGCGTGTATGCAAAATGCGCTTCTGTC
TGAGAAAGAACTGTTGGGAAAGGCATTGATGAAGCGTGTATGCAAAATGCGCTTCTGTC
:\*\*\*\* \*\* \* \*\* \*\* \* \*\* \*\* \* \*\* \*\* \* \*\* \*\* \* \*\* \*\* \* \*\*

CAGTGTCTCTTGGAAATGATGATCTTTCATCTTCTTCCCTGCAACGGCTCAGAA
CAGTGTCTCTTGGAAATGATGATCTTTCATCTTCTTCCCTGCAACGGCTCAGAA
TGCAGATGCTCTTGGAAATGATGATCTTTCATCTTCTTCCCTGCAACGGCTCAGAA
TAGTACTGCTCTTGGAAATGATGATCTTTCATCTTCTTCCCTGCAACGGCTCAGAA
:..\*\*\*\*\* \*\* \*\* \*\* \* \*\* \*\* \* \*\* \*\* \* \*\* \*\* \* \*\* \*\* \* \*\*

ATATCGTGTGAGAACCTGTATGAAGTCTCTTGTATGATGTTTACGCAACAGCTATCAG
ATATCGTGTGAGAACCTGTATGAAGTCTCTTGTATGATGTTTACGCAACAGCTATCAG
GTACCGTGTGAGAACCTGTATGAAGTCTCTTGTATGATGTTTACGCAACAGCTATCAG
ATATCGTGTGAGAACCTGTATGAAGTCTCTTGTATGATGTTTACGCAACAGCTATCAG
\*\* \*\* \*\* \* \*\* \*\* \* \*\* \*\* \* \*\* \*\* \* \*\* \*\* \* \*\* \* \*\* \*\*

GAACCTGTGATCCAAATGGACCCTTATGCTCTATGATCAAAAGATGATTCCAGCATCTGA
GAACCTGTGATCCAAATGGACCCTTATGCTCTATGATCAAAAGATGATTCCAGCATCTGA
GAACCTGTGATCCAAATGGACCCTTATGCTCTATGATCAAAAGATGATTCCAGCATCTGA
GAACCTGTGATCCAAATGGACCCTTATGCTCTATGATCAAAAGATGATTCCAGCATCTGA
\*\*\*\*\* \*\* \*\* \* \*\* \*\* \* \*\* \*\* \* \*\* \*\* \* \*\* \*\* \* \*\* \*\* \* \*\*

TAAGGGTAGGTTCTTTGCCTTTGGTCTGTTCTTGTGCAAGGAGTCTACTGGTATGAA
TAAGGGTAGGTTCTTTGCCTTTGGTCTGTTCTTGTGCAAGGAGTCTACTGGTATGAA
CAAGGGTAGGTTCTTTGCCTTTGGTCTGTTCTTGTGCAAGGAGTCTACTGGTATGAA
TAAGGGTAGGTTCTTTGCCTTTGGTCTGTTCTTGTGCAAGGAGTCTACTGGTATGAA
\*\*\*\*\* \*\* \*\* \* \*\* \*\* \* \*\* \*\* \* \*\* \*\* \* \*\* \*\* \* \*\* \*\* \* \*\*

GGTTAGGATATGGGTCACAACTATGTTCTGGAGAGAGAAAGATTTGTATGTAAGAG
GGTTAGGATATGGGTCACAACTATGTTCTGGAGAGAGAAAGATTTGTATGTAAGAG
GGTTAGGATATGGGTCACAACTATGTTCTGGAGAGAGAAAGATTTGTATGTAAGAG
GGTTAGGATATGGGTCACAACTTTGTTCTGGAGAGAGAAAGATTTGTATGTAAGAG
\*\* \*\* \*\* \* \*\* \*\* \* \*\* \*\* \* \*\* \*\* \* \*\* \*\* \* \*\* \* \*\* \*\*

TGTTACAGAACTGTCATTGGATGGGAAAGAGACAAGAAACAGTTGAGGATGTTCCCTG
TGTTACAGAACTGTCATTGGATGGGAAAGAGACAAGAAACAGTTGAGGATGTTCCCTG
TGTTACAGAACTGTTATCTGGATGGGTAAGAGGAGGAGACTGTTGAGGATGTTCCCTG
TGTTACAGAACTGTCATTGGATGGGAAAGAGACAAGAAACAGTTGAGGATGTTCCATG
\*\* \*\* \*\* \* \*\* \*\* \* \*\* \*\* \* \*\* \*\* \* \*\* \*\* \* \*\* \* \*\* \*\*

TGTTAATACAGTTGCTATGGTGGTTGGATCAGTTCAATACCAAGAATGCAACTTTGAC
TGTTAATACAGTTGCTATGGTGGTTGGATCAGTTCAATACCAAGAATGCAACTTTGAC
TGTTAATACAGTTGCTATGGTGGTTGGATCAGTTCAATACCAAGAATGCAACTTTGAC
TGTTAATACAGTTGCTATGGTGGTTGGATCAGTTCAATACCAAGAATGCAACTTTGAC
\*\*\*\*\* \*\* \*\* \* \*\* \*\* \* \*\* \*\* \* \*\* \*\* \* \*\* \*\* \* \*\* \*\* \* \*\*

AAATGAAAGGAGTGTGATGCTCATCCTATCCGAGCCATGAAATTTTCAGTCTCCCTGT
AAATGAAAGGAGTGTGATGCTCATCCTATCCGAGCCATGAAATTTTCAGTCTCCCTGT
CAACGAGGAGGAGTGTGATGCTCATCCTATCCGAGCCATGAAATTTTCAGTCTCCCTGT
AAATGAAAGGAGTGTGATGCTCATCCTATCCGAGCCATGAAATTTTCAGTCTCCCTGT
\*\* \*\* \*\* \* \*\* \*\* \* \*\* \*\* \* \*\* \*\* \* \*\* \*\* \* \*\* \* \*\* \*\*

TGTGCGTGTGGCGTGAATGCAAAAGTTGCATCTGACCTTCCCAAACCTTGTGAAGGCT
TGTGCGTGTGGCGTGAATGCAAAAGTTGCATCTGACCTTCCCAAACCTTGTGAAGGCT
TGTGCGTGTGCTGTTGCTGTTGCTGTTGCTGTTGCTGTTGCTGTTGCTGTTGCTGTTGCT
TGTGCGTGTGGCGTGAATGCAAAAGTTGCATCTGACCTTCCCAAACCTTGTGAAGGCT
\*\* \*\* \*\* \* \*\* \*\* \* \*\* \*\* \* \*\* \*\* \* \*\* \*\* \* \*\* \* \*\* \*\*

GAAACGCTGGCCAAAGTCAGATCCTATGGTGGTATGTTCTA-----
GAAACGCTGGCCAAAGTCAGATCCTATGGTGGTATGTTCTA-----
GAAACGCTGGCCAAAGTCAGATCCTATGGTGGTATGTTCTA-----

```

H. lupulus-HL.SW.v1.0.G039978.1      GAAACGTTTAGCTAAGTCAGATCCTATGGTGGTGTGTTCTA-----
***** * ** ***** ** * ** * ** * ** * ** * ** * **
-----
Textile-hemp-csa_locus_674_iso_1_len_2081_ver_2
Marijuana-C32108059
L.usitatissimum-Lus10031201
H.lupulus-HL.SW.v1.0.G039978.1      CATCATTGCTGGTGTCTGGAGAGCTTCACCTTGAATCTGTTGAAGGATCTTGTGGATGA
-----
-----
Textile-hemp-csa_locus_674_iso_1_len_2081_ver_2
Marijuana-C32108059
L.usitatissimum-Lus10031201
H.lupulus-HL.SW.v1.0.G039978.1      CTTTCATGGGTGGTGTCTGAGATCACGAAATCCGACCCAGTTGTCTTCCGTGAAACCGT
-----
-----
Textile-hemp-csa_locus_674_iso_1_len_2081_ver_2
Marijuana-C32108059
L.usitatissimum-Lus10031201
H.lupulus-HL.SW.v1.0.G039978.1      CCTTGAGAAATCAAGCAGAGTCGTTCATGAGCAAGTCCCCCAACAAGCATAACCGTCTCTA
-----
-----
Textile-hemp-csa_locus_674_iso_1_len_2081_ver_2
Marijuana-C32108059
L.usitatissimum-Lus10031201
H.lupulus-HL.SW.v1.0.G039978.1      CATGGAGCCAGACCATTGGAGGAAGGATTAGCTGAGGCAATCGATGATGGCCGATTGG
-----
-----
Textile-hemp-csa_locus_674_iso_1_len_2081_ver_2
Marijuana-C32108059
L.usitatissimum-Lus10031201
H.lupulus-HL.SW.v1.0.G039978.1      CCCAAGGGATGACCCCAAGGTCCGTCCAAGATCCTCTGAGGAGTTCCGCTGGGACAA
-----
-----
Textile-hemp-csa_locus_674_iso_1_len_2081_ver_2
Marijuana-C32108059
L.usitatissimum-Lus10031201
H.lupulus-HL.SW.v1.0.G039978.1      GGATCTCGCCAAGAAGATCTGGTGTCTCGGTCCCAGACCCCGCCCTAACATGGTAGT
-----
-----
Textile-hemp-csa_locus_674_iso_1_len_2081_ver_2
Marijuana-C32108059
L.usitatissimum-Lus10031201
H.lupulus-HL.SW.v1.0.G039978.1      GGACATGTGTAAGGGAGTTCACTACCTGAATGAAATCAAGGATTCAAGTGGTGGGTT
-----
-----
Textile-hemp-csa_locus_674_iso_1_len_2081_ver_2
Marijuana-C32108059
L.usitatissimum-Lus10031201
H.lupulus-HL.SW.v1.0.G039978.1      CCAGTGGGCATCAAAGGAAGGTGCGCTGCAGAAGAAAACATGAGAGGAATCTGCTTCGA
-----
-----
Textile-hemp-csa_locus_674_iso_1_len_2081_ver_2
Marijuana-C32108059
L.usitatissimum-Lus10031201
H.lupulus-HL.SW.v1.0.G039978.1      AGTCTGTGATGTGGTTCTCCACGCCGATGCTATCCACAGAGTGGTGGTCAAGTCATCCC
-----
-----
Textile-hemp-csa_locus_674_iso_1_len_2081_ver_2
Marijuana-C32108059
L.usitatissimum-Lus10031201
H.lupulus-HL.SW.v1.0.G039978.1      AACAGCCAGGAGGGTCATCTACGCTTCCCACTGTCTGCCAGCCAAGGCTGGTCGAGCC
-----
-----
Textile-hemp-csa_locus_674_iso_1_len_2081_ver_2
Marijuana-C32108059
L.usitatissimum-Lus10031201
H.lupulus-HL.SW.v1.0.G039978.1      TTGCTACCTCGCGGNNNNNNNNNNNNNNNNNNNNNNNNNNNNNNNNNNNNNNNNNNNNNN
-----
-----
Textile-hemp-csa_locus_674_iso_1_len_2081_ver_2
Marijuana-C32108059
L.usitatissimum-Lus10031201
H.lupulus-HL.SW.v1.0.G039978.1      NNNNNNNNNNNNNNNNNNNNNNNNNNNNNNNNNNNNNNNNNNNNNNNNNNNNNNNNNNN
-----
-----
Textile-hemp-csa_locus_674_iso_1_len_2081_ver_2
Marijuana-C32108059
L.usitatissimum-Lus10031201
H.lupulus-HL.SW.v1.0.G039978.1      NNNNNNNNNNNNNNNNAAGAGGAAGGTTTGAAGGAGCAGATGACCCCTCTCCGATT
-----
-----
Textile-hemp-csa_locus_674_iso_1_len_2081_ver_2
Marijuana-C32108059
L.usitatissimum-Lus10031201
H.lupulus-HL.SW.v1.0.G039978.1      TCGAGGACAAGCTGTAAGAGCATCTTTGGTCTTTGCTGCAGGAGATGGATGATCCTAGT
-----
-----
Textile-hemp-csa_locus_674_iso_1_len_2081_ver_2
Marijuana-C32108059
L.usitatissimum-Lus10031201
H.lupulus-HL.SW.v1.0.G039978.1      TATGTTTTTTTTTATACTGATGTTGTGCTGTGGTTTGAGTCTATTATGTGA
-----
-----

```

**Actin**

```

L.usitatissimum-Lus10001694
Textile-hemp-csa_locus_2263_iso_5_len_1488_ver_2
Marijuana-scaffold122787
H.lupulus-HL.SW.v1.0.G017631.1
-----
-----CTTCTCTCTCTCAAACCTCTA---AACTCTAAACCATTCATCTTTTCATT
TGTTGCATTCCTTAGTATCATTTGT-ATCGCTATATGACGATCTACCGCTTTT--ATTTATT

L.usitatissimum-Lus10001694
Textile-hemp-csa_locus_2263_iso_5_len_1488_ver_2
Marijuana-scaffold122787
H.lupulus-HL.SW.v1.0.G017631.1
-----
CATTTACCACAAACCTCTAAACTTCCATCTTGTCTTTTCGCATTTCAACAGGTAAGTGAA
ATTTTATGAA----AGATGTTCTTACAGCATAG-TTTGGTGAACAAATAGTAAAGTAA

L.usitatissimum-Lus10001694
Textile-hemp-csa_locus_2263_iso_5_len_1488_ver_2
Marijuana-scaffold122787
H.lupulus-HL.SW.v1.0.G017631.1
-----
-ATGGCAGAAGGTGAGGATATCCAGCCCCCTCGTCTGCGCAATGGAACAGGAATGGTCA-
GATGGCAGATGCAGAGGATATTCAGCCACTTGTCTGCGATAATGGAACAGGAATGGTCA-
GATGGCAGATGCAGAGGATATTCAGCCACTTGTCTGCGATAATGGAACAGGAATGGTCAA
-----

L.usitatissimum-Lus10001694
Textile-hemp-csa_locus_2263_iso_5_len_1488_ver_2
Marijuana-scaffold122787
H.lupulus-HL.SW.v1.0.G017631.1
-----
GGTATTAATGTTTATTTGTCTTGTGTTTAAAGTTTCCCATGGAATCATTAACTTCTGTGC
-----

L.usitatissimum-Lus10001694
Textile-hemp-csa_locus_2263_iso_5_len_1488_ver_2
Marijuana-scaffold122787
H.lupulus-HL.SW.v1.0.G017631.1
-----
AAAAGCTAGCTTAATGTTACTCGTGGGTGTGTAGAATTTGCCTCTTGACCATGAATATT
-----

L.usitatissimum-Lus10001694
Textile-hemp-csa_locus_2263_iso_5_len_1488_ver_2
Marijuana-scaffold122787
H.lupulus-HL.SW.v1.0.G017631.1
-----
-----AGGCTGGATTGCTGGAGATGATGCCCTCGTGTGTGTTCCCCA
-----AGCTGGGTTTGTGGAGATGATGCTCCACGAGCTGTGTTCCCCA
GTGATCTTACCTATTAGGCTGGGTTTGTGGAGATGATGCTCCACGAGCTGTGTTCCCCA

L.usitatissimum-Lus10001694
Textile-hemp-csa_locus_2263_iso_5_len_1488_ver_2
Marijuana-scaffold122787
H.lupulus-HL.SW.v1.0.G017631.1
-----
GTATTGTTGGTCTGCCACGTACACTGGCGTATGGTTGGAATGGGTGAGAAAGATGCCT
GTATCGTGGTCTGCTCCTCGTACACTGGTGAATGGTTGGAATGGGCCAGAAAGACGCAT
GTATCGTGGTCTGCTCCTCGTACACTGGTGAATGGTTGGAATGGGCCAGAAAGACGCAT
-----

L.usitatissimum-Lus10001694
Textile-hemp-csa_locus_2263_iso_5_len_1488_ver_2
Marijuana-scaffold122787
H.lupulus-HL.SW.v1.0.G017631.1
-----
ATGTTGGTGTGAGCCAGTCCAAGAGAGGTATTTTGACATTGAAATACCAATTAAGAC
ATGTTGGTGTGAGGCACAATCCAAGCGAGGTATCTTAACCTGGAAGTACCAATTAAGAC
ACGTGGTGTGAGGCACAATCCAAGCGAGGTATCTTAACCTGGAAGTACCAATTAAGAC
-----

L.usitatissimum-Lus10001694
Textile-hemp-csa_locus_2263_iso_5_len_1488_ver_2
Marijuana-scaffold122787
H.lupulus-HL.SW.v1.0.G017631.1
-----
ATGTTATTGTGAACAATTGGGATGACATGGAAAAGATTGGCATCACACCTTCTACAACG
ATGTTATTGTGAGCAACTGGGATGACATGGAAAAGATTGGCATCACACTTTTACAATG
ATGTTATTGTGAGCAACTGGGATGACATGGAAAAGATTGGCATCACACTTTTACAATG
-----

L.usitatissimum-Lus10001694
Textile-hemp-csa_locus_2263_iso_5_len_1488_ver_2
Marijuana-scaffold122787
H.lupulus-HL.SW.v1.0.G017631.1
-----
AGCTTCGTGTGCTCCGGAAGAGCACCCCTGTTCTTCTGACTGAGGCTCCTCTGAACCCCA
AGCTTCGTGTGCTCCCTGAGGAAACCCCGTTCTTCTAACCGAAGCTCCACTTAACCCCA
AGCTTCGTGTGCTCCCTGAGGAAACCCCGTTCTTCTAACCGAAGCTCCACTTAACCCCA
-----

L.usitatissimum-Lus10001694
Textile-hemp-csa_locus_2263_iso_5_len_1488_ver_2
Marijuana-scaffold122787
H.lupulus-HL.SW.v1.0.G017631.1
-----
AGGCAATCGTGAGAAGATGACCCAGATCATGTTTGAGACCTTCAATACCCCTGCATGT
AGGCCAATCGTGAAAAATGACCCAGATCATGTTTGAGACCTTCAACACCCCTGCTATGT
AGGCCAATCGTGAAAAATGACCCAGATCATGTTTGAGACCTTCAACACTCCTGCTATGT
-----

L.usitatissimum-Lus10001694
Textile-hemp-csa_locus_2263_iso_5_len_1488_ver_2
Marijuana-scaffold122787
H.lupulus-HL.SW.v1.0.G017631.1
-----
ATGTTGCTATTTCAGGCTGTATTGTCACTGTATGCCAGTGGTCTGACAACTGGT-----
ATGTTGCCATTCAAGCCGTTCTTTCTGTATGCCAGTGGTCTGACTACCGGT-----
ATGTTGCCATTCAAGCTGTTCTTTCTGTATGCCAGTGGTCTGACTACCGGTGAGTACC
-----

L.usitatissimum-Lus10001694
Textile-hemp-csa_locus_2263_iso_5_len_1488_ver_2
Marijuana-scaffold122787
H.lupulus-HL.SW.v1.0.G017631.1
-----
AAGTACTTTCTTTCTTTCTTTTTCATTGTCGTAGCATGATTTCTGTTAGAGTATCCTATA
-----

L.usitatissimum-Lus10001694
Textile-hemp-csa_locus_2263_iso_5_len_1488_ver_2
Marijuana-scaffold122787
H.lupulus-HL.SW.v1.0.G017631.1
-----
GATACTGAAATGAGTCTTTAAATATGGTAAGAACTGAGATTTTACTAATACCAATCTCAT
-----

L.usitatissimum-Lus10001694
Textile-hemp-csa_locus_2263_iso_5_len_1488_ver_2
Marijuana-scaffold122787
H.lupulus-HL.SW.v1.0.G017631.1
-----
TCTGTTTACCAGCTACTTGCATCATGATATGATAGTTTCTTACCTTGTCAAATATTGTAG
-----

L.usitatissimum-Lus10001694
Textile-hemp-csa_locus_2263_iso_5_len_1488_ver_2
Marijuana-scaffold122787
H.lupulus-HL.SW.v1.0.G017631.1
-----
TGTGGCTTTGGTTTGGAAATTATATTTTCTTGAAGTTTAAACCTTGACCCTCATTTTC
-----

L.usitatissimum-Lus10001694
Textile-hemp-csa_locus_2263_iso_5_len_1488_ver_2
Marijuana-scaffold122787
H.lupulus-HL.SW.v1.0.G017631.1
-----
TAATACTATTATGAGCTTTTATATGCGCTGTCTTAAATAAATTAGCTAGAAGTTTTC
-----

```





H.lupulus-HL.SW.v1.0.G017631.1

-----



L.usitatissimum-Lus10042553  
Marijuana-scaffold3694  
Textile-hemp-csa\_locus\_6842\_iso\_2\_len\_854\_ver\_2  
H.lupulus-HL.SW.v1.0.G028342.1

-----  
GACTTTTTTTTAAACATAACAATACTGCGAGCATTGATGATTCAGA  
-----



|                                                                                                                                                                                                           |                                                                                                                                                                                                                                                                  |
|-----------------------------------------------------------------------------------------------------------------------------------------------------------------------------------------------------------|------------------------------------------------------------------------------------------------------------------------------------------------------------------------------------------------------------------------------------------------------------------|
| <p>L.usitatissimum-Lus10000872<br/>                 Marijuana-scaffold25527<br/>                 Textile-hemp-csa_locus_1460_iso_2_len_1872_ver_2<br/>                 H.lupulus-HL.SW.v1.0.G008610.1</p> | <p>AGATTGGCGTGGTGGTGGAGCTAGTCAGAATATCATTCCAAGTTCTACCGGTGCAGC<br/>                 GGATTGGAGAGGAGGCCCGTGGAGCTGGACAAAATATATTCTAGTTCTACTGGTGCAGC<br/>                 GGATTGGAGAGGAGGCCCGTGGAGCTGGACAAAATATCATTCTAGTTCTACTGGTGCAGC<br/>                 -----</p>   |
| <p>L.usitatissimum-Lus10000872<br/>                 Marijuana-scaffold25527<br/>                 Textile-hemp-csa_locus_1460_iso_2_len_1872_ver_2<br/>                 H.lupulus-HL.SW.v1.0.G008610.1</p> | <p>GAAGGCTGTTGGAAAGTACTTCCAGAGCTGAACGGAAACTTACTGGCATGGCTTTCCG<br/>                 AAAGGCTGTTGGTAAAGTTCTCCAGAACTGAATGGAAAGCTTACTGGAATGGCTTCCG<br/>                 AAAGGCTGTTGGTAAAGTTCTCCAGAACTGAATGGAAAGCTTACTGGAATGGCTTCCG<br/>                 -----</p>     |
| <p>L.usitatissimum-Lus10000872<br/>                 Marijuana-scaffold25527<br/>                 Textile-hemp-csa_locus_1460_iso_2_len_1872_ver_2<br/>                 H.lupulus-HL.SW.v1.0.G008610.1</p> | <p>TGTCCAACGCCTAATGTTTCTGTTGTGGACTTAACTTGTGCACTTGAGAAGAGTGCATC<br/>                 TGTTCaACTCCTAATGTCTCAGTGGTgGACTTAACTTGTGCACTTGAGAAGAGTGCATC<br/>                 TGTTCCTACTCCTAATGTCTCAGTGGTAGACTTAACTTGTGCACTTGAGAAGAGTGCATC<br/>                 -----</p> |
| <p>L.usitatissimum-Lus10000872<br/>                 Marijuana-scaffold25527<br/>                 Textile-hemp-csa_locus_1460_iso_2_len_1872_ver_2<br/>                 H.lupulus-HL.SW.v1.0.G008610.1</p> | <p>ATACGATGATGTTAAAGCTGCTATTAAAGTATGCATCTGAGGGACCATTGAAGGGCATTCT<br/>                 TTATGAA-----<br/>                 TTATGAAGATGTCAAGGCAGCCATTAAAGTATGCGTCAGAGGGACCATTAAAGGCATTCT<br/>                 -----</p>                                              |
| <p>L.usitatissimum-Lus10000872<br/>                 Marijuana-scaffold25527<br/>                 Textile-hemp-csa_locus_1460_iso_2_len_1872_ver_2<br/>                 H.lupulus-HL.SW.v1.0.G008610.1</p> | <p>TGGATACACTGATGAGGATGTCGTTTCTAATGATTTTCATCGGCACTCAAGTCAAGCAT<br/>                 TGGGTACACAGATGAAGATGTTGTCTCCAATGATTT-GTTGGTGACACAAGGTCAAGTAT<br/>                 -----</p>                                                                                  |
| <p>L.usitatissimum-Lus10000872<br/>                 Marijuana-scaffold25527<br/>                 Textile-hemp-csa_locus_1460_iso_2_len_1872_ver_2<br/>                 H.lupulus-HL.SW.v1.0.G008610.1</p> | <p>ATTGATGCAAGGCCGGGATAGGTTGAGCAGTTCCCTCATGAAGCTCGTGTCTGGTA<br/>                 TTTGATGCCAAGGCTGGAATAGGGCTTAGCACATCCTTCATGAAGCTTGTGTCTATGGTA<br/>                 -----</p>                                                                                     |
| <p>L.usitatissimum-Lus10000872<br/>                 Marijuana-scaffold25527<br/>                 Textile-hemp-csa_locus_1460_iso_2_len_1872_ver_2<br/>                 H.lupulus-HL.SW.v1.0.G008610.1</p> | <p>CGACAATGAGTGGGGTTACAGCAACCGAGTTCTGGACCTCATCGAGCACATGGCTTGGT<br/>                 CGATAAGCAATGGGGATACAGCAACCGTGTGTTGGACCTTATTGAGCACATGGCTTGGT<br/>                 -----</p>                                                                                   |
| <p>L.usitatissimum-Lus10000872<br/>                 Marijuana-scaffold25527<br/>                 Textile-hemp-csa_locus_1460_iso_2_len_1872_ver_2<br/>                 H.lupulus-HL.SW.v1.0.G008610.1</p> | <p>AGCTTCCCT--GAAGTGA-----<br/>                 AGCGGCTACCTACTAAGTATTGTTGCTGCTGCAACAACAATTTTTTTAGAGCTCTTGCT<br/>                 -----</p>                                                                                                                       |
| <p>L.usitatissimum-Lus10000872<br/>                 Marijuana-scaffold25527<br/>                 Textile-hemp-csa_locus_1460_iso_2_len_1872_ver_2<br/>                 H.lupulus-HL.SW.v1.0.G008610.1</p> | <p>-----<br/>                 ATGAGTTTGGTTGGAGAGTAGTTAATACATTTTGATAGGGTTTCGGGTTTTTCTCATCT<br/>                 -----</p>                                                                                                                                         |
| <p>L.usitatissimum-Lus10000872<br/>                 Marijuana-scaffold25527<br/>                 Textile-hemp-csa_locus_1460_iso_2_len_1872_ver_2<br/>                 H.lupulus-HL.SW.v1.0.G008610.1</p> | <p>-----<br/>                 CATTGGTCCGATTTAAAGATTTTCGCATGGTTGAGTTTGAATAATGAAAATCTGAGA<br/>                 -----</p>                                                                                                                                           |
| <p>L.usitatissimum-Lus10000872<br/>                 Marijuana-scaffold25527<br/>                 Textile-hemp-csa_locus_1460_iso_2_len_1872_ver_2<br/>                 H.lupulus-HL.SW.v1.0.G008610.1</p> | <p>-----<br/>                 TGTATGGGCTTTGATAATCATTGTCTCATGGAGTTGATGCCATTATATACATATTGAG<br/>                 -----</p>                                                                                                                                          |
| <p>L.usitatissimum-Lus10000872<br/>                 Marijuana-scaffold25527<br/>                 Textile-hemp-csa_locus_1460_iso_2_len_1872_ver_2<br/>                 H.lupulus-HL.SW.v1.0.G008610.1</p> | <p>-----<br/>                 AAGGGTTTCTTCTGCTCTCTGTATGGCTTTTCTTTCTAGTAACTTTGACATGAATCT<br/>                 -----</p>                                                                                                                                           |
| <p>L.usitatissimum-Lus10000872<br/>                 Marijuana-scaffold25527<br/>                 Textile-hemp-csa_locus_1460_iso_2_len_1872_ver_2<br/>                 H.lupulus-HL.SW.v1.0.G008610.1</p> | <p>-----<br/>                 TTCATCTCTGATAAAAAATGGTTTCATTTCCTATGTTGATCAATGCTAGTATCAACTACC<br/>                 -----</p>                                                                                                                                        |
| <p>L.usitatissimum-Lus10000872<br/>                 Marijuana-scaffold25527<br/>                 Textile-hemp-csa_locus_1460_iso_2_len_1872_ver_2<br/>                 H.lupulus-HL.SW.v1.0.G008610.1</p> | <p>-----<br/>                 AAATACATCTGAATATGGGTACAGCTCAAGTTATAGGCATAATAAATAATTTTTAAACCAC<br/>                 -----</p>                                                                                                                                       |
| <p>L.usitatissimum-Lus10000872<br/>                 Marijuana-scaffold25527<br/>                 Textile-hemp-csa_locus_1460_iso_2_len_1872_ver_2<br/>                 H.lupulus-HL.SW.v1.0.G008610.1</p> | <p>-----<br/>                 ATTATAAATGCAAAATGGCATCAAATTAATTGCT<br/>                 -----</p>                                                                                                                                                                  |

eTIF4E

L.usitatissimum-Lus10023733
Marijuana-scaffold35425
Textile-hemp-csa\_locus\_9035\_iso\_2\_len\_909\_ver\_2
H.lupulus-HL.SW.v1.0.G000377.1

-----A
-----GAGAGATACACTTTTCATTCAAAG--CTCCAACGAATCCTAACCA
CCGCTCTCCGATCTGAGAGATACACTTTTCATTCAAAG--CTCCAACGAATCCTAACCA
-----GATTCACATTCATCTCACTCCATACATCGAATCGGAACCA
\*

L.usitatissimum-Lus10023733
Marijuana-scaffold35425
Textile-hemp-csa\_locus\_9035\_iso\_2\_len\_909\_ver\_2
H.lupulus-HL.SW.v1.0.G000377.1

TGGCGACCAACGACACTGCGGCGACCGAAGTAAGCGACGCATCGGTGGTTACGTCGCGCG
TGGCGACTGAGATGGCAGCGGCCACCGAGGCCAACATTTAGCAGAGCCCGAGGCTGCGAG
TGGCGACTGAGATGACGCGGCCACCGAGGCCAACATTTAGCAGAGCCCGAGGCTGCGAG
TGGCGACTGAGATGACGCGGCCACCGAGGCCAACAGTGTAGCAGAGCCCGAGATTGCGAG
\*\*\*\*\*.\*.:.\*:\*\*.\* \*\* \*\*.\* \*.\*. \*.\*:\* \*.\* \*\*.\*

L.usitatissimum-Lus10023733
Marijuana-scaffold35425
Textile-hemp-csa\_locus\_9035\_iso\_2\_len\_909\_ver\_2
H.lupulus-HL.SW.v1.0.G000377.1

ACGCAATGGCG--GA-----GACGTCCCCTCAGTCTCAAGCTCCACAGAAAGTGGGA
CGGCTATTTGGCCGAGAACAAAGCGCAAGGCGAGCCACACAAGTTGGATAAGAAATGGGA
CGGCTATTTGGCCGAGAACAAAGCGCAAGGCGAGCCACACAAGTTGGATAAGAAATGGGA
CGGCAATGGTGGCCGAAAGCAAGACACAGCCGAGCCGCAAGTTGGATAAGAAATGGGA
.\*.\*\*.\* \* \*\* \*\*.\* \*\*.\* \*\*.\* \*\*.\* \*\*.\* \*\*.\* \*\*.\* \*\*.\* \*\*.\* \*\*.\* \*\*.\*

L.usitatissimum-Lus10023733
Marijuana-scaffold35425
Textile-hemp-csa\_locus\_9035\_iso\_2\_len\_909\_ver\_2
H.lupulus-HL.SW.v1.0.G000377.1

CCTTCTGGTTCGACAACCAATCCAAACCCAAAGCAGGCGCGCTGGGGCACTCTCTTC
CCTTTTGGTTCGATAACCAATCTAAGCCTAAGCAAGGCGCGCTGGGGCACTCTCTTC
CCTTTTGGTTCGATAACCAATCTAAGCCTAAGCAAGGCGCGCTGGGGCACTCTCTTC
CCTTTTGGTTCGATAACCAAGTCCAAAGCCAAAGCAAGGCGCTGGGGCACTCTCTTC
\*\*\*\* \*\*.\* \*\*.\* \*\*.\* \*\*.\* \*\*.\* \*\*.\* \*\*.\* \*\*.\* \*\*.\* \*\*.\* \*\*.\* \*\*.\* \*\*.\*

L.usitatissimum-Lus10023733
Marijuana-scaffold35425
Textile-hemp-csa\_locus\_9035\_iso\_2\_len\_909\_ver\_2
H.lupulus-HL.SW.v1.0.G000377.1

GTAGTGTCTACACTTTCGACACCGTCGAGGAATTTGTGTGTTGTATGAACAGGTATTTA
GCTCTGTCTACACTTTTGACACCGTCGAGGAATTTGTGTGTTGTATGACAGGTATTTCA
GCTCTGTCTACACTTTTGACACCGTCGAGGAATTTGTGTG-----GATTCACATTCATCTCACTCCATACATCGAATCGGAACCA
\* : \*\*\*\*\* \*\* \*\*\*\*\* \*\*.\* \*\*\*\*\* \*\*.\* \*\*\*\*\* \*\*.\* \*\*\*\*\*

L.usitatissimum-Lus10023733
Marijuana-scaffold35425
Textile-hemp-csa\_locus\_9035\_iso\_2\_len\_909\_ver\_2
H.lupulus-HL.SW.v1.0.G000377.1

AGCCTAGCAAGCTACCTGGACAAGCTGAATCCACTGTTTAGGGATGGGTTGAACCCA
AGCCTAGCAAGTTGACATCAGATTCAGATTTATAATTAATCTACTA-----
AGCCTAGCAAGTTGACATCAGATTCAGATTTCCATTTGTTCAAAGCTGGGTTGAACCCA

L.usitatissimum-Lus10023733
Marijuana-scaffold35425
Textile-hemp-csa\_locus\_9035\_iso\_2\_len\_909\_ver\_2
H.lupulus-HL.SW.v1.0.G000377.1

AGTGGGAAGATCCAGAGTGTGCTAATGGGGGAAAGTGGAGTGTACCTGTAGTAAAAACA
-----CAGGTTTACTGTTATCAGCAGTAGAAAAAT
AGTGGGAAGATCCTGAATGTGCTAATGGGGGAAAGTGGAGTGTATCAGCAGTAGAAAAAT
-----

L.usitatissimum-Lus10023733
Marijuana-scaffold35425
Textile-hemp-csa\_locus\_9035\_iso\_2\_len\_909\_ver\_2
H.lupulus-HL.SW.v1.0.G000377.1

CCACCTTGGATAAGATGTGGCTCGAAACTCTGATGGCTTTGATGGAGAGCAATTTGATG
CTACCCCTTGACACTATGTGGTTAGAAACTTTGATGGCTTTGATGGAGAGCAATTTGATG
CTACCCCTTGACACTATGTGGTTAGAAACTTTGATGGCTTTGATGGAGAGCAATTTGATG
-----

L.usitatissimum-Lus10023733
Marijuana-scaffold35425
Textile-hemp-csa locus 9035 iso 2 len 909 ver 2
H.lupulus-HL.SW.v1.0.G000377.1

AATCCGAGGAGATATGTGGCGTGGTTGCCAAGTGTGCGTACAAGGCAAGATAAACTTGCTC
AGGCTGATGAGATTTGTGGTGTGGTTCGCAAGCGGTGCGCCAGAGGCAAGGCAAACTTGCGC
AGGCTGATGAGATTTGTGGTGTGGTTCGCAAGCGGTGCGCCAGAGGCAAGGCAAACTTGCGC
-----

L.usitatissimum-Lus10023733
Marijuana-scaffold35425
Textile-hemp-csa\_locus\_9035\_iso\_2\_len\_909\_ver\_2
H.lupulus-HL.SW.v1.0.G000377.1

TCTGGACTAAGACGGCTGCTAATGAAGCTGTCCAGATGGGCATCGGAAGAAAGTGGAAAG
TCTGGACCAAGACAGCTGCCAATGAGGCTGTTCCAGATGAGCATTGGAAGAAAGTGGAAAG
TCTGGACCAAGACAGCTGCCAATGAGGCTGTTCCAGATGAGCATTGGAAGAAAGTGGAAAG
-----

L.usitatissimum-Lus10023733
Marijuana-scaffold35425
Textile-hemp-csa\_locus\_9035\_iso\_2\_len\_909\_ver\_2
H.lupulus-HL.SW.v1.0.G000377.1

ATATCATCGATGTCAGTGCACAACTCACCTACAATTTCCATGATGATTTCTCGCAGGAAA
AGATACTAGACACAACACTGACAAAATCACTTACAGCTTCCATGATGATTTGAAAAGAGAGA
AGATACTAGACACAACACTGACAAAATCACTTACAGCTTCCATGATGATTTGAAAAGAGAGA
-----

L.usitatissimum-Lus10023733
Marijuana-scaffold35425
Textile-hemp-csa\_locus\_9035\_iso\_2\_len\_909\_ver\_2
H.lupulus-HL.SW.v1.0.G000377.1

GATCTGTGAAGAGCCGATACAGCGTATGA-----
GATCTGCAAGGGTGTGTTACACTATACCATGAACATTTACTCGACAATTTGAGGCTTGATC
GATCTGCAAGGGTGTGTTACACTATACCATGAACATTTACTCGACAATTTGAGGCTTGATC
-----

L.usitatissimum-Lus10023733
Marijuana-scaffold35425
Textile-hemp-csa\_locus\_9035\_iso\_2\_len\_909\_ver\_2
H.lupulus-HL.SW.v1.0.G000377.1

-----
CCTTACTTACTTACTTTGCAATTTTACAAAATACTAGCAGCGGCAACTCATTGCGAGATTTT
CCTTACTTACTTACTTTGCAATTTTACAAAATACTAGCAGCGGCAACTCATTGCGAGATTTT
-----

L.usitatissimum-Lus10023733
Marijuana-scaffold35425
Textile-hemp-csa\_locus\_9035\_iso\_2\_len\_909\_ver\_2
H.lupulus-HL.SW.v1.0.G000377.1

-----
GATGTTTTCTGTCTATTGAGGAAAACCAATTAGATTAATATTTTTTTTGGTGTGTTTTTT
GATGT-TTCTGTCTATTGAGGAAAACCAATTAGATCAAATAT-TTTTTTGGTGTGTTTTTT
-----

L.usitatissimum-Lus10023733
Marijuana-scaffold35425
Textile-hemp-csa\_locus\_9035\_iso\_2\_len\_909\_ver\_2
H.lupulus-HL.SW.v1.0.G000377.1

-----
GATTGTAACATGACAACCGCTCTTATTTTATTTTATTGATGCAAAATTTTTCATCAAAA--
GATTGTAACATGACAACCGCTCTTATTTT-TTTGATGCAAAATTTTTCATCAAAAAA
-----

L.usitatissimum-Lus10023733
Marijuana-scaffold35425
Textile-hemp-csa\_locus\_9035\_iso\_2\_len\_909\_ver\_2
H.lupulus-HL.SW.v1.0.G000377.1

-----
AATGATTACTTAAA
AATGATTACTTAAA
-----

TIP41

```

L.usitatissimum-Lus10026859
Textile-hemp-csa_locus_3380_iso_1_len_1164_ver_2
H.lupulus-HL.Tea.v1.0.G021288.1
Marijuana-scaffold76878
-----
ATTATTTTGATTGCCCATTTATAATGAAGTTGATCAAATTCAAAACCTCAAAGTTGGCC
ATTATTTTGATTGCCCATTTATAATGAAGTTGATCAAATTCAAAACCTCAAAGTTGGCC
-----

L.usitatissimum-Lus10026859
Textile-hemp-csa_locus_3380_iso_1_len_1164_ver_2
H.lupulus-HL.Tea.v1.0.G021288.1
Marijuana-scaffold76878
-----
TTGGGCCCAAATTCACAGTGAATAATAAGGCAAGGCAAGGCAAA--AGGGACTCAAAC
TTGGGCCCAAATTCACAGTGAATAATAAGGCAAGGCAAAaggtaccttggagcgcgAC
-----

L.usitatissimum-Lus10026859
Textile-hemp-csa_locus_3380_iso_1_len_1164_ver_2
H.lupulus-HL.Tea.v1.0.G021288.1
Marijuana-scaffold76878
-----
-----ATGGCCGAGGAGGTAGACGACAAGGACCTGA
CGAAGATCGATCGAACCGGACTGTGGAATGGAAGTGGAGTTGACCATAACGAGCTCA
CGAAGATCGATCGAACCGGACTGTGGAATGGAAGTGGAGTTGACCATAACGAGCTCA
-----

L.usitatissimum-Lus10026859
Textile-hemp-csa_locus_3380_iso_1_len_1164_ver_2
H.lupulus-HL.Tea.v1.0.G021288.1
Marijuana-scaffold76878
-----
AAGCCGCGGAGCTGAGCTTTTGACCGAGCCCTCCGCGGACTCCGTATTCATGGCTGGG
AGGCGGCTGGAGCCGAGCTTCTAACTGAAGGACGTCATGGCATCCGTATCCATGGTTGGG
-----
AGGCGGCTGGAGCCGAGCTTCTAACTGAAGGACGTCATGGCATCCGTATCCATGGTTGGG
-----

L.usitatissimum-Lus10026859
Textile-hemp-csa_locus_3380_iso_1_len_1164_ver_2
H.lupulus-HL.Tea.v1.0.G021288.1
Marijuana-scaffold76878
-----
AGATCGTCTCAAAGCTGGCTCTATTCTCACTCTCCGCTGTGAACATGGAGCTTTGC
AGGTCGAGTCTCGCAATTGCTCCATTCTCACCTCTTCCATCTTTGAAC-----
AGGTCGAGTCTCGCAATTGCTCCATTCTCACCTCTTCCACTTTGAAC-----

L.usitatissimum-Lus10026859
Textile-hemp-csa_locus_3380_iso_1_len_1164_ver_2
H.lupulus-HL.Tea.v1.0.G021288.1
Marijuana-scaffold76878
-----
TGCACGTACACCTCGAACTCTTTGTTGTCACAAAGTGGTGGTGTGGCCAAAGTTTGTG
-----

L.usitatissimum-Lus10026859
Textile-hemp-csa_locus_3380_iso_1_len_1164_ver_2
H.lupulus-HL.Tea.v1.0.G021288.1
Marijuana-scaffold76878
-----
CCGTTGTCTGTGCGGACTGGTGAATATACATGCTCAATCTACTTGCAGGTGGGAGG
AGTGGGGAG
-----
AGTGGGGAG
-----

L.usitatissimum-Lus10026859
Textile-hemp-csa_locus_3380_iso_1_len_1164_ver_2
H.lupulus-HL.Tea.v1.0.G021288.1
Marijuana-scaffold76878
-----
AGAAACTGCAGACCTCTCACCTACCAGATGGTGTGGCGCAGAGCTGTCTGGTTCTCA
AAAAGCTTCAGACATCCCATTTGCCAGAAATGATATTTGGGGCAGTGTGTTGGTCTCTA
AAAAGCTTCAGACATCCCATTTGCCAGAAATGATATTTGGGGCAGTGTGTTGGTCTCTA
-----

L.usitatissimum-Lus10026859
Textile-hemp-csa_locus_3380_iso_1_len_1164_ver_2
H.lupulus-HL.Tea.v1.0.G021288.1
Marijuana-scaffold76878
-----
AACATATCAAGAGTGGCACCAAAATCCATTTTAAATGCATTGTATGCGCTAACCGGTTGGA
AGCACATTCCTAGTGGCACTAAAATTCATTTTAAATGCGTTGTATGCTCTACTTGGATGGA
AGCACAACTCCTAGTGGCACTAAAATTCATTTTAAATGCGTTGTATGCTCTACTTGGATGGA
-----

L.usitatissimum-Lus10026859
Textile-hemp-csa_locus_3380_iso_1_len_1164_ver_2
H.lupulus-HL.Tea.v1.0.G021288.1
Marijuana-scaffold76878
-----
AGCAGGAAGCTTTACCCCGAGTTGAAGTTCCTGCTGTCACAATGGAAATTCAGAAGCA
AACAGGAAGCTCTGCCGCTGTGGAAGTCCGGCCGCTGAAAATGGAAATTCGCCAGCA
AACAGGAAGCTCTGCCGCTGTGGAAGTCCGGCCGCTGAAAATGGAAATTCGCCAGCA
-----

L.usitatissimum-Lus10026859
Textile-hemp-csa_locus_3380_iso_1_len_1164_ver_2
H.lupulus-HL.Tea.v1.0.G021288.1
Marijuana-scaffold76878
-----
AGCCGTTCCACAGGTGATACTAGATTATGATTATACACTTACACACCATACATGGAA
AACCATCCCAACAGGTCATTTGGATTATGATTACACTTTTACACACCTTATCGTGGAA
AACCATCCCAACAGGTCATTTGGATTATGATTACACTTTTACACACCTTATCGTGGAA
-----

L.usitatissimum-Lus10026859
Textile-hemp-csa_locus_3380_iso_1_len_1164_ver_2
H.lupulus-HL.Tea.v1.0.G021288.1
Marijuana-scaffold76878
-----
GTGAACTATTGAGA-----CCAGTGTGAAAGTGGAGAACCATTTCTGCAAGTG
GTGAAATGATTGAGATGGATGCAACCGAGCAAGAAAGAGAGGATTCCTCTGAGGGAACCT
GTGAAaATTGAGATGATGCAACCGAGCAAGAAAGAGAGGATTCCTCTGAGGGAACCT
-----

L.usitatissimum-Lus10026859
Textile-hemp-csa_locus_3380_iso_1_len_1164_ver_2
H.lupulus-HL.Tea.v1.0.G021288.1
Marijuana-scaffold76878
-----
GCAGGCTTCAATGGGAGGATTGCAAGGAACGAATTGATGTTGCTTCCTAGCTCAAAG
ACAATGTCAGTGGGAGGAGCAAGGAGAAAATGATATGGCTGCACTGGCACCCAAAG
-----
ACAATGTCAGTGGGAGGAGCAAGGAGAAAATGATATGGCTGCACTGGCACCCAAAG
-----

L.usitatissimum-Lus10026859
Textile-hemp-csa_locus_3380_iso_1_len_1164_ver_2
H.lupulus-HL.Tea.v1.0.G021288.1
Marijuana-scaffold76878
-----
AGCCTATTCTTTCTATGACGAGTGTGTTCTTTATGAAGATGAAGTGGCTGATAATGGAG
AGCCTATTCTTTCTATGATGAGGTAATATTATATGAAGATGAAGTGGCAGATAATGGGG
AGCCTATTCTTTCTATGATGAGGTAATATTATGAAGATGAAGTGGCAGATAATGGGG
-----

L.usitatissimum-Lus10026859
Textile-hemp-csa_locus_3380_iso_1_len_1164_ver_2
H.lupulus-HL.Tea.v1.0.G021288.1
Marijuana-scaffold76878
-----
TGTCACTTTTAAAGTAAAGTGAGAGTATGCAAGTTATTGGTTCTTCTTTTGGCAT
TGTGCTTCTAAGTAAAGTGAGAGTATGCCAAGTCTTGGTTCTTCTATTGGCCT
-----
TGTGCTTCTAAGTAAAGTGAGAGTATGCAAGTCTTGGTTCTTCTATTGGCCT
-----

L.usitatissimum-Lus10026859
Textile-hemp-csa_locus_3380_iso_1_len_1164_ver_2
H.lupulus-HL.Tea.v1.0.G021288.1
Marijuana-scaffold76878
-----
TTTGGCTTAGAGTTGATGGAGTCTGATGAGATTACGGGACACTCGCATCCATTGTGCTT
ATTGGCTCAGAGTTGATGGAGTCTTATGAGACTAAGAGACACTCGAATGCATTGTGTAT
---GTCAGAGTTGATGGAGTCTTATGAGAAAGAGACACTCGTATGCATTGTGTAT
ATTGGCTCAGAGTTGATGGAGTCTTATGAGACTAAGAGACACTCGAATGCATTGTGTAT
*** ***** ** ***** **.****** ** ***** :*
-----

L.usitatissimum-Lus10026859
Textile-hemp-csa_locus_3380_iso_1_len_1164_ver_2
H.lupulus-HL.Tea.v1.0.G021288.1
Marijuana-scaffold76878
-----
TTAGTGACAGTCCCAAGCCTGTCATCTTCGCGAAAGTTGCTGGAGACAAGCAACCTTCG
TTGGTGACAAGTCAAATCCAATCTTCTCGAGAAAGCTGTTGGAGAGAAGCTACATTTTC
TTGGTGACAATCAAATCCAATCTTCTCGAGAAAGCTGCTGGAGAGAGGCTACATTTTC
TTGGTGACAATCAAATCCAATCTTCTCGAGAAAGCTGCTGGAGAGAAGCTACATTTTC
TTGGTGACAATCAAATCCAATCTTCTCGAGAAAGCTGCTGGAGAGAAGCTACATTTTC
**.****** ** ***** ** ***** **.****** **.****** :*
-----

```



L.usitatissimum-Lus10026859  
Textile-hemp-csa\_locus\_3380\_iso\_1\_len\_1164\_ver\_2  
H.lupulus-HL.Tea.v1.0.G021288.1  
Marijuana-scaffold76878

AGGCTCTGTCTGCTAAAGGG-TACCCCATGTGACTCTGCTTACAGTGATCCTAACAAAC  
AATCTTTATCTGCAA-AAGGATACCCCTTCTGATCTGCTGCTTACAGTGACCCAGCTCC  
AATATTTATCTGCAAAGGATAACCCCTTCTGATCTGCTGCTTACAGTGACCCAGCTCC  
AATCTTTATCTGCAA-AAGGATACCCCTTCTGATCTGCTGCTTACAGTGACCCAGTgCC  
\* . . \* .\*\*\*\*\*: . \* . \* \* \* \* \* : \* \* \* \* . \* \* \* \* \* \* \* \* \* \* \* \* . \* \*

L.usitatissimum-Lus10026859  
Textile-hemp-csa\_locus\_3380\_iso\_1\_len\_1164\_ver\_2  
H.lupulus-HL.Tea.v1.0.G021288.1  
Marijuana-scaffold76878

ATCAGCCACAGGCTTCCAGTCGTTATGCATAGGACTCAAAGCTTATAGTCCCTGTAA  
ATCAGCCAGAGACTACCCATAGTCATGCACAAGTCTGAAGTCTTAAAGT-CCCTGGTAA  
ATCAGCCAGAGACTTCCCATTTGTCATGCACAAGTCTGAAGTCTTAAAGT-CCCTGGTAA  
ATCAGCCAGAGACTACCCATtGTCATGCACAAGTCTGAAGTCTTAAAGT-CCCcGGTAA  
\*\*\*\*\* \*\*.\*.\*.\*.\* \*\* \* \* \* \* \* \* . : \* \* \* \* \* \* \* \* \* \* \* \* \* \* \* \* \* \*

L.usitatissimum-Lus10026859  
Textile-hemp-csa\_locus\_3380\_iso\_1\_len\_1164\_ver\_2  
H.lupulus-HL.Tea.v1.0.G021288.1  
Marijuana-scaffold76878

-----  
CCTCTAGAGCTGTAATAATATATGCACGGATGATTGTTGAATTTAGCTTTTCATTGTG  
CCTCTAGAGCTGTAATA-ATTATATGCACGGAAAGATTGTTGAATTTAGCTTTTCATTGTG  
CCTCTAGAGCTGTAATA-ATTATATGCACGGAAaGATTGTTGAATTTAGCTTTTCATTGTG

L.usitatissimum-Lus10026859  
Textile-hemp-csa\_locus\_3380\_iso\_1\_len\_1164\_ver\_2  
H.lupulus-HL.Tea.v1.0.G021288.1  
Marijuana-scaffold76878

-----  
GTTCTGGTTGATGTTAACTTATTTATTTACGAAAAGAAAA-----TCGACAT  
GTTCTGGTTGATGTTAACTTATTTATTTACAAAAAGGAAAAAATGGAATAAACGACT  
GTTCTGGTTGATGTTAACTTATTTATTTACGAAAAGAAAA---A-----TtGcCAT

L.usitatissimum-Lus10026859  
Textile-hemp-csa\_locus\_3380\_iso\_1\_len\_1164\_ver\_2  
H.lupulus-HL.Tea.v1.0.G021288.1  
Marijuana-scaffold76878

-----  
ACATTTTCTTGTAATAATAAGTTTAACATCAACCAGAACC  
ACATTTTCTTGTA-----  
ACATTTTCTTGTA-----



|                                                                                                                                                                                                            |                                                                                                                                                                                                                                                                 |
|------------------------------------------------------------------------------------------------------------------------------------------------------------------------------------------------------------|-----------------------------------------------------------------------------------------------------------------------------------------------------------------------------------------------------------------------------------------------------------------|
| <p>L.usitatissimum-Lus10031032<br/>                 H.lupulus-HL.SW.v1.0.G004672.1<br/>                 Textile-hemp-csa_locus_11261_iso_1_len_1086_ver_2<br/>                 Marijuana-scaffold23181</p> | <p>ACATGGCTTGTGTCTGATGTACCGTGGTGACGTGGTTCCCAAAGATGTCAACGCAGCTG<br/>                 ACATGGCCTGCTGTTTGATGTACCGGGTGACGTGTTCCCAAAGATGTAAACGCCGCCG<br/>                 ACATGGCTTGTGTGTTGATGTACAGGGGAGATGTTGTACCAAAGGATGTGAACGCAGCAG<br/>                 -----</p> |
| <p>L.usitatissimum-Lus10031032<br/>                 H.lupulus-HL.SW.v1.0.G004672.1<br/>                 Textile-hemp-csa_locus_11261_iso_1_len_1086_ver_2<br/>                 Marijuana-scaffold23181</p> | <p>TGGCGACCATCAAGACAAAGAGGACCATCCAGTTCGTGGACTGGTGCCCAACTGGATTCA<br/>                 TGGCCA-----<br/>                 TCGCCA-----<br/>                 -----</p>                                                                                                |
| <p>L.usitatissimum-Lus10031032<br/>                 H.lupulus-HL.SW.v1.0.G004672.1<br/>                 Textile-hemp-csa_locus_11261_iso_1_len_1086_ver_2<br/>                 Marijuana-scaffold23181</p> | <p>AGTGTGGTATCAACTACCAGCCCAACTGTTGTCCCGAGGCGACCTTGCCAAGGTGC<br/>                 -----<br/>                 -----</p>                                                                                                                                           |
| <p>L.usitatissimum-Lus10031032<br/>                 H.lupulus-HL.SW.v1.0.G004672.1<br/>                 Textile-hemp-csa_locus_11261_iso_1_len_1086_ver_2<br/>                 Marijuana-scaffold23181</p> | <p>AGAGGGCTGTGTGCATGATCTCCAACCTCCACCAGTGTGGCAGAGGTGTTGGGCGAATTG<br/>                 -----<br/>                 -----</p>                                                                                                                                       |
| <p>L.usitatissimum-Lus10031032<br/>                 H.lupulus-HL.SW.v1.0.G004672.1<br/>                 Textile-hemp-csa_locus_11261_iso_1_len_1086_ver_2<br/>                 Marijuana-scaffold23181</p> | <p>ACCACAAGTTTGTATCTCATGTACGCCAAGCGTGCATTGCTCCACTGGTATGTGGGTGAGG<br/>                 -----<br/>                 -----</p>                                                                                                                                      |
| <p>L.usitatissimum-Lus10031032<br/>                 H.lupulus-HL.SW.v1.0.G004672.1<br/>                 Textile-hemp-csa_locus_11261_iso_1_len_1086_ver_2<br/>                 Marijuana-scaffold23181</p> | <p>GTATGGAGGAAGGAGAGTTCTCTGAGGCACGTGAGGATCTGGCTGCTCTTGAGAAGGACT<br/>                 -----<br/>                 -----</p>                                                                                                                                       |
| <p>L.usitatissimum-Lus10031032<br/>                 H.lupulus-HL.SW.v1.0.G004672.1<br/>                 Textile-hemp-csa_locus_11261_iso_1_len_1086_ver_2<br/>                 Marijuana-scaffold23181</p> | <p>ACGAGGAGGTTGGCGCTGAGGCTCCTGAGGATGGAGAAGATGAAGGTGATGAGTACTGA<br/>                 -----<br/>                 -----</p>                                                                                                                                        |



L.usitatissimum-Lus10028862  
Textile-hemp-csa\_locus\_8286\_iso\_2\_len\_2019\_ver\_2  
H.lupulus-HL.SW.v1.0.G043506.1  
Marijuana-scaffold109107

GGAGAGAAAAGCTGCACAGCTTACCAGGACGATAGTTGGAGTGTGAAGCTTGTCACTC  
AGAGAGAAAAGCTGCTGACCTTACTAGGACTATTTGGAGTCTTGGAAAGCTGCCATTC  
AGAGAGAAAAGCTGCTGACCTTACTAGGACTATTTGGAGTCTTGGAAAGCTGCCATTC  
\*\*\*\*\* \*\* \* \*\*\*\*\* \*\* \* \*\*\*\*\* \*\* \* \*\*\*\*\* \*\* \* \*\*\*\*\* \*\* \* \*\*\*\*\*

L.usitatissimum-Lus10028862  
Textile-hemp-csa\_locus\_8286\_iso\_2\_len\_2019\_ver\_2  
H.lupulus-HL.SW.v1.0.G043506.1  
Marijuana-scaffold109107

GCTTGGTGTGATGCATCGGACCTTAAGCCGGAGAATTTCTGTTTGTGAGTCAACAAGA  
ATTGGGGTTATGCATCGGACCTTAAGCCCTGAGAATTTCTTTTTGTCAACAGCAGGGA  
ATTGGGGTTATGCATCGGACCTTAAGCCCTGAGAATTTCTTTTTGTCAACAGCAGGGA  
ATTGGGGTTATGCATCGGACCTTAAGCCCTGAGAATTTCTTTTTGTCAACAGCAGGGA  
. \* \* \* \* \* \*\*\*\*\* \* \* \* \* \* \*\*\*\*\* \* \* \* \* \* \*\*\*\*\* \* \* \* \* \* \*\*\*\*\*

L.usitatissimum-Lus10028862  
Textile-hemp-csa\_locus\_8286\_iso\_2\_len\_2019\_ver\_2  
H.lupulus-HL.SW.v1.0.G043506.1  
Marijuana-scaffold109107

GGATTGCTGCTCAAAACTATTGATTTTGACTATCAATCTTCTTCAAGCCAGGAGAAA  
GGATGCACTTCTCAAAACTATTGACTTTGGTTTATCTGTTTTCTTCAAGCCAGGAGAG  
GGATGCACTTCTCAAAACTATTGACTTTGGTTTATCTGTTTTCTTCAAGCCAGG-----  
GGATGCACTTCTCAAAACTATTGACTTTGGTTTATCTGTTTTCTTCAAGCCAGGAGAG  
\*\*\*\* \* . \* \*\*\*\*\* \* \* \* \* \* \*\*\*\*\* \* \* \* \* \* \*\*\*\*\*

L.usitatissimum-Lus10028862  
Textile-hemp-csa\_locus\_8286\_iso\_2\_len\_2019\_ver\_2  
H.lupulus-HL.SW.v1.0.G043506.1  
Marijuana-scaffold109107

GTATAGTGTAGTGTGGCAGTCCATACTATGTGGCTCTGAGGTTTTAAAGAAGCGTTA  
GTTTATGATGTGGTTGGCAGCCATATTACGTTGCACCAAGTCTTGGCAGCGGTA  
-----  
aTTTATGATGTGGTTGGCAGCCATATTACGTTGCACCAAGTCTTGGCAGCGGTA

L.usitatissimum-Lus10028862  
Textile-hemp-csa\_locus\_8286\_iso\_2\_len\_2019\_ver\_2  
H.lupulus-HL.SW.v1.0.G043506.1  
Marijuana-scaffold109107

TGGTCCGAGAGCTGATGTATGAGTGTGGTGTATTCTCTACATTCTGTTAAGTGGAGT  
TGGTCCGAGAGCAGATGTTGGAGTGTGGAGTATTCTTTACATTCTGTTAAGTGGAGT  
-----  
TGGTCCGAGAGCAGATGTTGGAGTGTGGAGTATTCTTTACATTCTGTTAAGTGGAGT

L.usitatissimum-Lus10028862  
Textile-hemp-csa\_locus\_8286\_iso\_2\_len\_2019\_ver\_2  
H.lupulus-HL.SW.v1.0.G043506.1  
Marijuana-scaffold109107

GCCACCCTTCTGGGAGAGACCGAGCAGGGAATATTGAGCAGGTTCTCCAGGGTGTACT  
GCCTCAATTTGGGCTGAAAGTGAGCAAGGATATTGAAAGAGTGTTCATGTGCACCT  
-----  
GCCTCAATTTGGGCTGAAAGTGAGCAAGGATATTGAAAGAGTGTTCATGTGCACCT

L.usitatissimum-Lus10028862  
Textile-hemp-csa\_locus\_8286\_iso\_2\_len\_2019\_ver\_2  
H.lupulus-HL.SW.v1.0.G043506.1  
Marijuana-scaffold109107

TGACTTTGAATCTGAACCTTGGCCTAACATCTCCGAGAGTGTAAAGATTAGTTAGGAA  
TGATTTTTCAACAGAACCGTGGCCTAGTATTCTGAAGGTGCCAAGATTAGTGGAGAA  
-----  
CGATTTTTCAACAGAACCGTGGCCTAGTATTCTGAAGGTGCCAAGACTTAGTAGAGAA

L.usitatissimum-Lus10028862  
Textile-hemp-csa\_locus\_8286\_iso\_2\_len\_2019\_ver\_2  
H.lupulus-HL.SW.v1.0.G043506.1  
Marijuana-scaffold109107

AATGCTTGTCCGAGACCCAGAAAGCGACTAACTGCACATGAAGTTCTCTGCCATCCATG  
AATGCTTATTTCGAGACCTTAGGAGCGGATATCTGCACATGATGTTTTGTGCCATCCCTG  
-----  
AATGCTTATTTCGAGACCTTAGGAGCGGATATCTGCACATGATGTTTTGTGCCATCCCTG

L.usitatissimum-Lus10028862  
Textile-hemp-csa\_locus\_8286\_iso\_2\_len\_2019\_ver\_2  
H.lupulus-HL.SW.v1.0.G043506.1  
Marijuana-scaffold109107

GGTACAAGAAGAAGGTGTAGCTCTGACAAGCCTCTGATTCTGCGCTACTAAGTCGTTTT  
GGTTCAAGTTGGTGGTGGCTCTGACAAGCCTCTCGATTCTGCAATATTAAGTCGGTT  
-----  
GGTTCAAGTTGGTGGTGGCTCTGACAAGCCTCTCGATTCTGCAATATTAAGTCGGTT

L.usitatissimum-Lus10028862  
Textile-hemp-csa\_locus\_8286\_iso\_2\_len\_2019\_ver\_2  
H.lupulus-HL.SW.v1.0.G043506.1  
Marijuana-scaffold109107

GAAACAATTTCTCGCATGAACAAGCTTAAGAAAATGGCTATTATGATGCTGAGAG  
GAAACAATTTCTCGCATGAACAAGCTTAAGAAAATGGCTATTATGATGCTGAGAG  
-----  
GAAACAATTTCTCGCATGAACAAGCTTAAGAAAATGGCTATTATGATGCTGAGAG

L.usitatissimum-Lus10028862  
Textile-hemp-csa\_locus\_8286\_iso\_2\_len\_2019\_ver\_2  
H.lupulus-HL.SW.v1.0.G043506.1  
Marijuana-scaffold109107

TTTATCCGAGAGAAATTCAGGCTGAAGGAGATGTTCAAGATGATAGATGCTGTAGG  
CTTATCTGAAGAAGAAATTCAGGCTGAAGGAGATGTTCAAAATGATAGACACTGACAA  
-----  
CTTATCTGAAGAAGAAATTCAGGCTGAAGGAGATGTTCAAAATGATAGACACTGACAA

L.usitatissimum-Lus10028862  
Textile-hemp-csa\_locus\_8286\_iso\_2\_len\_2019\_ver\_2  
H.lupulus-HL.SW.v1.0.G043506.1  
Marijuana-scaffold109107

AAGCGCCAGATCACATTCGAAGAACTCAAGCTGGACTAAAAAGATTGGTGTACTCT  
CAGTGGTCAATCACTTTTGAAGAACTTAAGGCTGGTCTGAAAAGATTGGAGCTAATCT  
-----  
CAGTGGTCAATCACTTTTGAAGAACTTAAGGCTGGTCTGAAAAGATTGGAGCTAATCT

L.usitatissimum-Lus10028862  
Textile-hemp-csa\_locus\_8286\_iso\_2\_len\_2019\_ver\_2  
H.lupulus-HL.SW.v1.0.G043506.1  
Marijuana-scaffold109107

CAAGGAATCAGAAATCTACGATTTAATGCAAGCGGCAGATATAGACAACAGTGGCACCAT  
TAAGGAATCCGAAATTTATGATTTAATGCAAGCAGCAGATGTAGATAACAGTGGAAACAT  
-----  
TAAGGAATCCGAAATTTATGATTTAATGCAAGCAGCAGATGTAGATAACAGTGGAAACAT

L.usitatissimum-Lus10028862  
Textile-hemp-csa\_locus\_8286\_iso\_2\_len\_2019\_ver\_2  
H.lupulus-HL.SW.v1.0.G043506.1  
Marijuana-scaffold109107

TGATTACGCCGAGTTCATCGCTGCAACCTGACCTGAAACAAAATCGAGAGAGAGATCA  
TGATTACGCCGAGTTCATCGCTGCAACCTGACCTGAAACAAAATCGAGAGAGAGATCA  
-----  
TGATTACGCCGAGTTCATCGCTGCAACCTGACCTGAAACAAAATCGAGAGAGAGATCA

L.usitatissimum-Lus10028862  
Textile-hemp-csa\_locus\_8286\_iso\_2\_len\_2019\_ver\_2  
H.lupulus-HL.SW.v1.0.G043506.1  
Marijuana-scaffold109107

TCTATTTGCGAGCTTTTCTGACTTCGACAAGGATGGAAGTGGTTACATCACTCAAGACGA  
TTTGTTCGCGCATTTCTACTTTTGATAAAGCAGGAGTGGCTACATTACTCAAGATGA  
-----  
TTTGTTCGCGCATTTTCTGACTTCGACAAGGATGGAAGTGGTTACATCACTCAAGATGA

L.usitatissimum-Lus10028862  
Textile-hemp-csa\_locus\_8286\_iso\_2\_len\_2019\_ver\_2  
H.lupulus-HL.SW.v1.0.G043506.1  
Marijuana-scaffold109107

GCTTCAACAAGCTTGCAGGAGTTTGGCCACAAGACGTCGCTTGAAGAGATGATCAA  
GCTTCAACATGCTTGCAGGAGTTTGGGGTAGAGGACGTCGCGCTTGAAGAGATGATGCA  
-----  
GCTTCAACATGCTTGCAGGAGTTTGGGGTAGAGGACGTCGCGCTTGAAGAGATGATGCA

L.usitatissimum-Lus10028862  
Textile-hemp-csa\_locus\_8286\_iso\_2\_len\_2019\_ver\_2  
H.lupulus-HL.SW.v1.0.G043506.1  
Marijuana-scaffold109107

CGAAGTGTATCAGGACAATGACGGGCGCATAGATTACAACGAATTTGTGGCGATGATGCA  
AGAAGTTGATCAGGATAATGATGACGACATAGATTATAACGAGTTTGTGGCCATGATGCA  
-----  
AGAAGTTGATCAGGACAATGATGACGACATAGATTATAACGAGTTTGTGGCCATGATGCA

L.usitatissimum-Lus10028862  
Textile-hemp-csa\_locus\_8286\_iso\_2\_len\_2019\_ver\_2  
H.lupulus-HL.SW.v1.0.G043506.1

GAAAGGAAACGTAGCACCACCCCGGAAAGGAAAGGACTAGAGACTAGCTTCAAGATGGC  
GAAAGGAAACGTATGGT---GGCCCTGCTAAGAGGGGCTTACAAAATTCCTTCAAGATGGC  
-----

Marijuana-scaffold109107

GAAAGGAACTATTGGT---GGCCCTGCTAAGAAGGGCCTACAAAATTCCTTCAGCATTGC

L.usitatissimum-Lus10028862  
Textile-hemp-csa\_locus\_8286\_iso\_2\_len\_2019\_ver\_2  
H.lupulus-HL.SW.v1.0.G043506.1  
Marijuana-scaffold109107

GTTCAAAGATGCGCGGAAAATCAGCACCAGCAAGTAG  
TTTTAGAGAGGGTCGCAAACCTT-----  
-----  
TTTTAGAGAGGGTCGCAAACCTT-----

RAN

```

L.usitatissimum-Lus10025738
Marijuana-scaffold6813
Textile-hemp-csa_locus_1455_iso_4_len_1015_ver_2
H.lupulus-HL.SW.v1.0.G039301.1
-----
--AAAGTATAGCTTTCACACAGCAAAATATTTAACACTTTGGAGATCTGGAAGGATTC
CAAAAGTATAGCTTTCACACAGCAAAATATTTAACACTTTGGAGATCTGGAAGGATTC
-----

L.usitatissimum-Lus10025738
Marijuana-scaffold6813
Textile-hemp-csa_locus_1455_iso_4_len_1015_ver_2
H.lupulus-HL.SW.v1.0.G039301.1
-----
TCAATCTCTCTCTCTCTATATATTCTCCGGTAAGTTCTAGAGAGAGAAGGTGAAGTG
TCAATCTCTCTCTCTCTATATATTCTCCGGTAAGTTCTAGAGAGAGAAGGTGAAGTG
-----

L.usitatissimum-Lus10025738
Marijuana-scaffold6813
Textile-hemp-csa_locus_1455_iso_4_len_1015_ver_2
H.lupulus-HL.SW.v1.0.G039301.1
-----
-----ATGGC-----TGGGTATGGAGATCCTAGTCAGAAAGTGGATTATGCTTTTA
TGAAAATGGCAGCGGTGGAGGCTACGGCGATACGAGCCAGAAGATAGATTACGTGTTCA
TGAAAATGGCAGCGGTGGAGGCTACGGCGATACGAGCCAGAAGATAGATTACGTGTTCA
-----

L.usitatissimum-Lus10025738
Marijuana-scaffold6813
Textile-hemp-csa_locus_1455_iso_4_len_1015_ver_2
H.lupulus-HL.SW.v1.0.G039301.1
-----
AGGTGGTCTGATTGGAGACTCGGCGTGGGGAAGTCTCAGATACTTCTAGATTTTCGA
AGGTTGTGTGATCGGAGATTTCGGCGTGGGGAAGTACAGATTCTGGCTCGGTTTGTCTA
AGGTTGTGTGATCGGAGATTTCGGCGTGGGGAAGTACAGATTCTGGCTCGGTTTGTCTA
-----

L.usitatissimum-Lus10025738
Marijuana-scaffold6813
Textile-hemp-csa_locus_1455_iso_4_len_1015_ver_2
H.lupulus-HL.SW.v1.0.G039301.1
-----
GGAATGAGTTCAGTCTCGACTCCAAGCCACCATCGGCGTTCGAGTTCAGACACGGACTA
GGAATGAGTTCAGTTCGACTCCAAGCCACCATCGGCGTTCGAGTTCAGACACGGACTC
GGAATGAGTTCAGTTCGACTCCAAGCCACCATCGGCGTTCGAGTTCAGACACGGACTC
-----

L.usitatissimum-Lus10025738
Marijuana-scaffold6813
Textile-hemp-csa_locus_1455_iso_4_len_1015_ver_2
H.lupulus-HL.SW.v1.0.G039301.1
-----
TGGTTATACAGCACAAGAGCGTCAAGGCTCAGATCTGGGATACCCGCGGCAAGAAGCAT
TCGTCATCGAACACAAGAGTGTAAAGGCTCAGATCTGGGATACGACGGCCAGGAACGAT
TCGTCATCGAACACAAGAGTGTAAAGGCTCAGATCTGGGATACGACGGCCAGGAACGAT
-----GAT
***

L.usitatissimum-Lus10025738
Marijuana-scaffold6813
Textile-hemp-csa_locus_1455_iso_4_len_1015_ver_2
H.lupulus-HL.SW.v1.0.G039301.1
-----
ACAGAGCGGTTCACAGTCTTATTACAGAGGTGCGGTAGGGGCGATGTTGGTGTACGACA
ACAGAGCGGTGACGAGTGCATACTATAGGGGAGCTGTGGGGCAATGCTTGTATTGATA
ACAGAGCGGTGACGAGTGCATACTATAGGGGAGCTGTGGGGCAATGCTTGTATTGATA
ACAGGGCAATTACGAGTGCATATTATAGGGGAGCTGTGGGGCAATGCTTGTATTGATA
****.*** ** *.*****.*** ** *.***.*** ** *.*****.*** ** ** *
-----

L.usitatissimum-Lus10025738
Marijuana-scaffold6813
Textile-hemp-csa_locus_1455_iso_4_len_1015_ver_2
H.lupulus-HL.SW.v1.0.G039301.1
-----
TAACCAAGCGCCAGACCTTGTATCACATTCCGCGTGGTGAAGAGTTCAGTGTTCATG
TAACCAAGCGCCAGACCTTGTATCACATTCCGCGTGGTGAAGAGTTCAGTGTTCATG
TAACCAAGCGCCAGACCTTGTATCACATTCCGCGTGGTGAAGAGTTCAGTGTTCATG
TAACCAAGCGCCAGACCTTGTATCACATTCCGCGTGGTGAAGAGTTCAGTGTTCATG
TAACCAAGCGCCAGACCTTGTATCACATTCCGCGTGGTGAAGAGTTCAGTGTTCATG
*****.*** ** *.*****.*** ** *.***.*** ** *.*****.*** ** *
-----

L.usitatissimum-Lus10025738
Marijuana-scaffold6813
Textile-hemp-csa_locus_1455_iso_4_len_1015_ver_2
H.lupulus-HL.SW.v1.0.G039301.1
-----
CTGACAAGAATATTGTTATCATTCTGGTAGGGAACAAGTGTGATCTTGAGGAACAGAGAG
CTGACAAGAACATAGTCACTATTCTGATCGGAACAACAACTGATTCAGAGAACCAGCGTG
CTGACAAGAACATAGTCACTATTCTGATCGGAACAACAACTGATTCAGAGAACCAGCGTG
CTGACAAGAACATAGTCACTATTCTGATCGGAACAACAACTGATTCAGAGAACCAGCGTG
*****.*** ** *.*****.*** ** *.***.*** ** *.*****.*** ** *
-----

L.usitatissimum-Lus10025738
Marijuana-scaffold6813
Textile-hemp-csa_locus_1455_iso_4_len_1015_ver_2
H.lupulus-HL.SW.v1.0.G039301.1
-----
GAGTACCACAGAGGATGCCAAGGAATTTGCAGAGAAGGAGGTTTGTCTTCTCTAGAAA
CAGTCCCCTAGGAAGCGCCAAAGAAATTTGCCAGAAAGAGGGCTTTTCTTTTGGAGA
CAGTCCCCTAGGAAGCGCCAAAGAAATTTGCCAGAAAGAGGGCTTTTCTTTTGGAGA
CAGTCCCCTAGGAAGCGCTAAAGAAATTTGCTCAGAAAGAGGGCTTTTCTTTTGGAGA
****.*****.*** ** *.*****.*** ** *.***.*** ** *.*****.*** ** *
-----

L.usitatissimum-Lus10025738
Marijuana-scaffold6813
Textile-hemp-csa_locus_1455_iso_4_len_1015_ver_2
H.lupulus-HL.SW.v1.0.G039301.1
-----
CCTCCGCATTGAACGCCAATGTTGGAGAGTGCCTTTTCAACGGTATTGACGGAGATAT
CTTCAGCACTGGAATCAACTAATGTCGAGAAACGCTTCTTTCAGCGTCTCAGAGATTT
CTTCAGCACTGGAATCAACTAATGTCGAGAAACGCTTCTTTCAGCGTCTCAGAGATTT
CTTCAGCACTGGAATCAACTAATGTCGAGAAACGCTTCTTTCAGCGTCTCAGAGATTT
* ** .*** ** *.*** ** *.*****.*** ** *.***.*** ** *.*****.*** ** *
-----

L.usitatissimum-Lus10025738
Marijuana-scaffold6813
Textile-hemp-csa_locus_1455_iso_4_len_1015_ver_2
H.lupulus-HL.SW.v1.0.G039301.1
-----
TCAACATTGTAAACAAAAGAGCTTGACAGCTGATGAGAATCAAGGCAACGGTAAACCTG
TCAACATTGTGAACAAGAAGAACCTTGGCGTGTGAAAACCAAGGAATGGTAAACCTG
TCAACATTGTGAACAAGAAGAACCTTGGCGTGTGAAAACCAAGGAATGGTAAACCTG
TCAACATTGTGAACAAGAAGAACCTTGGCGTGTGAAAACCAAGGAATGGTAAACCTG
*****.*** ** *.***.*** ** *.*****.*** ** *.***.*** ** *.*****.*** ** *
-----

L.usitatissimum-Lus10025738
Marijuana-scaffold6813
Textile-hemp-csa_locus_1455_iso_4_len_1015_ver_2
H.lupulus-HL.SW.v1.0.G039301.1
-----
GTCATTAGCTGGTAAGAAAATCTGTTGCCAGGCCCTGCACAAGTAATCCAGCAAAGA
CATCCCTTACTGGCAAGAAGATCATCGTCCGGCCCTGCACAAGTTATCCCTGAAAAGA
CATCCCTTACTGGCAAGAAGATCATCGTCCGGCCCTGCACAAGTTATCCCTGAAAAGA
CATCCCTTACTGGCAAGAAGATCATCGTCCAGGCTCTGCACAGTTATCCAGAAAAGA
* ** .*** ** *.*** ** *.*****.*** ** *.***.*** ** *.*****.*** ** *
-----

L.usitatissimum-Lus10025738
Marijuana-scaffold6813
Textile-hemp-csa_locus_1455_iso_4_len_1015_ver_2
H.lupulus-HL.SW.v1.0.G039301.1
-----
GAAACATGTGTTGCACCTCATCGTGA-----
ACAAGATGTGTTGTACATCATCGTATCTAATCTTTTGACAAAAGTGG-TCTCAAATACA
ACAAGATGTGTTGTACATCATCGTATCTAATCTTTTGACAAAAGTGG-TCTCAAATACA
ACAAGATGTGTTGTACATCATCGTATCTAATCTTTTGACAAAAGTGG-TCTCAAATACA
..* ** *.*****.*** ** *.***.*** ** *.*****.*** ** *
-----

L.usitatissimum-Lus10025738
Marijuana-scaffold6813
Textile-hemp-csa_locus_1455_iso_4_len_1015_ver_2
H.lupulus-HL.SW.v1.0.G039301.1
-----
AGATTCTGTTTTCAAATCTCAAATAGCAATTTTGTGATGGTGGTGTTTTTTCATT
AGATTCTGTTTTCAAATCTCAAATAGCAATTTTGTGATGGTGGTGTTTTTTCATT
AGATTCTGTTTTCAAATCTCAAATAGCAATTTTGTGATGGTGGTGTTTTTTCATT
-----

L.usitatissimum-Lus10025738
Marijuana-scaffold6813
Textile-hemp-csa_locus_1455_iso_4_len_1015_ver_2
H.lupulus-HL.SW.v1.0.G039301.1
-----
TGATATTTTTACATGTTTTAGCCTTGTAGTTGCATGGGCGGCCGAACTCTTGCTCfAT
TGATATTTTTACATGTTTTAGCCTTGTAGTTGCATGGGCGGCCGAACTCTTGCTCTGT
TGATATGTTTTACATGTTTTAGCCTTGTAGTTGGATGGGCGAGCTGAACACTTGCCCGT
-----

L.usitatissimum-Lus10025738
Marijuana-scaffold6813
Textile-hemp-csa_locus_1455_iso_4_len_1015_ver_2
H.lupulus-HL.SW.v1.0.G039301.1
-----
TATGATAAGGAAAGAAAGAACTA-AGTTGAAGTTGAGTTGCA-----
TATGATAAGGAAAGAAAGAACTA-AGTTGAAGTTGAGTTGCAAGATCGAAGAGCGGTT
TATGACAAGGAAAGAAAGAACTAAGTTGAAGTTGAGTTGCA-----

```

Clathrin

L.usitatissimum-Lus10040086  
 Marijuana-scaffold38061  
 Textile-Hemp-csa\_locus\_5464\_iso\_6\_len\_1880\_ver\_2  
 H.lupulus-HL.SW.v1.0.G042778.1  
 -----  
 ACAAAAcaaatACAACtCAactcttCTCTTCTCCATTTCTGCTTTGTGAATTTCTT  
 -----ACAAAAACAACtCAACTCTTCTCTCCATTTCTGCTTTGTGAATTTCTT  
 -----

L.usitatissimum-Lus10040086  
 Marijuana-scaffold38061  
 Textile-Hemp-csa\_locus\_5464\_iso\_6\_len\_1880\_ver\_2  
 H.lupulus-HL.SW.v1.0.G042778.1  
 -----  
 CCATTTCTCCCTTACCAAGAAAGCAGAGATCAAATCAAATAGATAGGCCATCCATCTTT  
 CCATTTCTCCCTTACCAAGAAAGCAGAGATCAAATCAAATAGATAGGCCATCCATCTTT  
 -----

L.usitatissimum-Lus10040086  
 Marijuana-scaffold38061  
 Textile-Hemp-csa\_locus\_5464\_iso\_6\_len\_1880\_ver\_2  
 H.lupulus-HL.SW.v1.0.G042778.1  
 -----  
 CAAATCTTACGTCCAGATCGCAACTACTCCGCCCTAGATCTGATTCGGACGCCACCCAC  
 CAAATCTTACGTCCAGATCGCAACTACTCCGCCCTAGATCTGATTCGGACGCCACCCAC  
 -----

L.usitatissimum-Lus10040086  
 Marijuana-scaffold38061  
 Textile-Hemp-csa\_locus\_5464\_iso\_6\_len\_1880\_ver\_2  
 H.lupulus-HL.SW.v1.0.G042778.1  
 -----  
 -----ATGCCGGTAGCTGCTTCAGCTCTCTATTTCTTGAACCTCCGCGGCGATGT  
 TGGATCCGTCATGCCGGTGGCTGCTCCGCCATTACTTCTTGAACCTCCGAGGCGATGT  
 TGGATCCGTCATGCCGGTGGCTGCTCCGCCATTACTTCTTGAACCTCCGAGGCGATGT  
 -----

L.usitatissimum-Lus10040086  
 Marijuana-scaffold38061  
 Textile-Hemp-csa\_locus\_5464\_iso\_6\_len\_1880\_ver\_2  
 H.lupulus-HL.SW.v1.0.G042778.1  
 -----  
 CCTCATCAATCGTCTCTACCGCGAGATGTTGGGGAAATATGGTGTGCGTTCGGAT  
 TCTCATCAATCGTCTCTACCGCGAGATGTTGGGGAAATATGGTGTGCGTTCGGAT  
 TCTCATCAATCGTCTCTACCGCGAGATGTTGGGGAAATATGGTGTGCGTTCGGAT  
 -----

L.usitatissimum-Lus10040086  
 Marijuana-scaffold38061  
 Textile-Hemp-csa\_locus\_5464\_iso\_6\_len\_1880\_ver\_2  
 H.lupulus-HL.SW.v1.0.G042778.1  
 -----  
 GCATATATGTCAGACGAAGAACTTGGGACATGCCCTGTGCGTCAAATGGAGGCTGTT  
 GCATATAATGCAAACAAAGAACTTGGTACATGTCCTGTACGACAAATAGGGGGATGTT  
 GCATATAATGCAAACAAAGAACTTGGTACATGTCCTGTACGACAAATAGGGGGATGTT  
 -----

L.usitatissimum-Lus10040086  
 Marijuana-scaffold38061  
 Textile-Hemp-csa\_locus\_5464\_iso\_6\_len\_1880\_ver\_2  
 H.lupulus-HL.SW.v1.0.G042778.1  
 -----  
 ATTTCTTTATATGAGGATCAGCAACGCTACATTGTGGTTGAGTGTGAGCAGCAATGCTAA  
 TTTCTTTACATGAGATAAGCAACGTGTACATTGTGATTTGTGTCAGCAGCAATGCAAA  
 TTTCTTTACATGAGATAAGCAACGTGTACATTGTGATTTGTGTCAGCAGCAATGCAAA  
 -----

L.usitatissimum-Lus10040086  
 Marijuana-scaffold38061  
 Textile-Hemp-csa\_locus\_5464\_iso\_6\_len\_1880\_ver\_2  
 H.lupulus-HL.SW.v1.0.G042778.1  
 -----  
 TGTGTCTGTGCATTCAAATTTGTGGTAGAGGCTGTGCACTATTCAAGTCATATCTCCG  
 TGTAGCTTGTGCGTTCAAGTTTGTGTTGAGGCGGTTGCGTTGTTCAAATCATATTTGG  
 TGTAGCTTGTGCGTTCAAGTTTGTGTTGAGGCGGTTGCGTTGTTCAAATCATATTTGG  
 -----

L.usitatissimum-Lus10040086  
 Marijuana-scaffold38061  
 Textile-Hemp-csa\_locus\_5464\_iso\_6\_len\_1880\_ver\_2  
 H.lupulus-HL.SW.v1.0.G042778.1  
 -----  
 TGGTGCATTTGATGAAGATGCTATCAGAAATAATTTGTTTTGATATACGAGTTGCTTGA  
 TGGGGCTTTTGTATGAAGATGCAATTCGTAATAATTTGTTTCTGATTTATGAACGTTTGA  
 TGGGGCTTTTGTATGAAGATGCAATTCGTAATAATTTGTTTCTGATTTATGAACGTTTGA  
 -----

L.usitatissimum-Lus10040086  
 Marijuana-scaffold38061  
 Textile-Hemp-csa\_locus\_5464\_iso\_6\_len\_1880\_ver\_2  
 H.lupulus-HL.SW.v1.0.G042778.1  
 -----  
 TGAGATCATGGACTTTGGATATCCACAGAATTTGCTCTCCTGAGATATTAAAGCTATACAT  
 TGAATTTATGGATTTGGTTACCCCAAATCTTCCACAGAAATTTGAAGTTGTACAT  
 TGAATTTATGGATTTGGTTACCCCAAATCTTCCACAGAAATTTGAAGTTGTACAT  
 -----

L.usitatissimum-Lus10040086  
 Marijuana-scaffold38061  
 Textile-Hemp-csa\_locus\_5464\_iso\_6\_len\_1880\_ver\_2  
 H.lupulus-HL.SW.v1.0.G042778.1  
 -----  
 TACTCAAGAAGGAGTGCAGTCCACATTTTCTCAAGCAAGCTTTGGATAAGCCTGTACC  
 TACTCAAGAAGGAGTGCAGTCCACATTTTCTCAAGCC--ACGGATAAGCCTGTACC  
 TACTCAAGAAGGAGTGCAGTCCACATTTTCTCAAGCC--ACGGATAAGCCTGTACC  
 -----

L.usitatissimum-Lus10040086  
 Marijuana-scaffold38061  
 Textile-Hemp-csa\_locus\_5464\_iso\_6\_len\_1880\_ver\_2  
 H.lupulus-HL.SW.v1.0.G042778.1  
 -----  
 AAATGCCACATTTGCAAGTTACAGGGGCTGTTGGTTGGCGAAGGAAGGACTCGTATACAA  
 TAATGCAACTCTACAAGTTACGGGTGCTGTTGGTTGGCGGAGAGAAGGCTGTTTATAA  
 TAATGCAACTCTACAAGTTACGGGTGCTGTTGGTTGGCGGAGAGAAGGCTGTTTATAA  
 -----

L.usitatissimum-Lus10040086  
 Marijuana-scaffold38061  
 Textile-Hemp-csa\_locus\_5464\_iso\_6\_len\_1880\_ver\_2  
 H.lupulus-HL.SW.v1.0.G042778.1  
 -----  
 AAAGAACGAGGTTTTCTGGATATTGGGAAAGCGTTAATCTTCTATGTCTCCAAAGG  
 AAAGAATGAGGTTTTTGGATATTGGGAAAGTGAATCTTCTATGTCTCCAAAGG  
 AAAGAATGAGGTTTTTGGATATTGGGAAAGTGAATCTTCTATGTCTCCAAAGG  
 -----

L.usitatissimum-Lus10040086  
 Marijuana-scaffold38061  
 Textile-Hemp-csa\_locus\_5464\_iso\_6\_len\_1880\_ver\_2  
 H.lupulus-HL.SW.v1.0.G042778.1  
 -----  
 TAGTGTACTACGTTGTGATGTAACGGGAAGATTCTGATGAAGTCTCTCTCCGGAAT  
 TAGTGTGTTGCGTTGTGATGTAACGGGAAGATTCTGATGAAGTCTCTCTCCGGAAT  
 TAGTGTGTTGCGTTGTGATGTAACGGGAAGATTCTGATGAAGTCTCTCTCCGGAAT  
 -----

L.usitatissimum-Lus10040086  
 Marijuana-scaffold38061  
 Textile-Hemp-csa\_locus\_5464\_iso\_6\_len\_1880\_ver\_2  
 H.lupulus-HL.SW.v1.0.G042778.1  
 -----  
 GCCTGATTTGAAGTTGGGTTTAAACGATAAAATGGCCCTTGAGAAAGAGTCACAACCTAA  
 CCTGATTTGAAGTTGGGTTTAAATGATAAGATTGGCCCTTGAAAAGAGTCACAACCTAA  
 GCCTGATTTGAAGTTGGGTTTAAATGATAAGATTGGCCCTTGAAAAGAGTCACAACCTAA  
 -----

L.usitatissimum-Lus10040086  
 Marijuana-scaffold38061  
 Textile-Hemp-csa\_locus\_5464\_iso\_6\_len\_1880\_ver\_2  
 H.lupulus-HL.SW.v1.0.G042778.1  
 -----  
 GAACCGTCCCACTAAAAGTGGTAAACAATGAGCTTGTGATGTTACTTTCCATCAATG  
 ATCTCGTCCCACTAAAAGTGGTAAACAATGAGCTTGTGATGTTACTTTCCATCAATG  
 ATCTCGTCCCACTAAAAGTGGTAAACAATGAGCTTGTGATGTTACTTTCCATCAATG  
 -----

L.usitatissimum-Lus10040086  
 Marijuana-scaffold38061  
 Textile-Hemp-csa\_locus\_5464\_iso\_6\_len\_1880\_ver\_2  
 H.lupulus-HL.SW.v1.0.G042778.1  
 -----  
 CGTGAACCTTAAACAAGGTTCAACTCGGAGAAGACAGTTAGTTTGTCCACCTGATGGTGA  
 TGTGAACCTTGAACGAGGTTTAAATCGGAGAAAACGTGAGTTTGTGCCACAGATGGTGA  
 TGTGAACCTTGAACGAGGTTTAAATCGGAGAAAACGTGAGTTTGTGCCACAGATGGTGA  
 -----







H. lupulus-HL.SW.v1.0.G001325.1
L.usitatissimum-LUS10031955
Textile-hemp-csa\_locus\_16122\_iso\_2\_len\_2075\_ver\_2
Marijuana-scaffold20047

GGTTCTCTGGTGGTCTGTTTGGCTTTCTGGGCTTGATGCGCTAACGTTCAAACCTTTA
GGTTCTCTGGGCGGACTCGTTTGGCTTTCCGGACTCGATGGGTTGACTTCAAGTCATTG
GGTTCTCTGGTGGTCTAATTTGCTTTTCTGGGCTAGATGGGCTAACTTTCAGAACTTTA
GGTTCTCTGGTGGTCTAATTTGCTTTTCTGGGCTAGATGGGCTAACTTTCAGAACTTTA
\*\*\*\*\* \*\* \*\*:\* .\*\*\*\*\* \*\* \*\* \* \*\* \*\* \* .\*\* \*\* \*\* .:;\* \*\* .

H. lupulus-HL.SW.v1.0.G001325.1
L.usitatissimum-LUS10031955
Textile-hemp-csa\_locus\_16122\_iso\_2\_len\_2075\_ver\_2
Marijuana-scaffold20047

GTTTGCATCCACTCACAAAACCTGGAGATCTCTACCAAATATGCAATFACAATCAGCAA
GTTTGCATCCCTTGACTCAGCATGGAGGACTTCCAGCATGCAACAATCAGCAG
GTTTGTAAATCCACTTACAAAACCTGGAGGCTCTACCAACTATGCAATACACCAGCAA
GTTTGTAAATCCACTTACAAAACCTGGAGGCTCTACCAACTATGCAATACACCAGCAA
\*\*\*\*\* \*\* \*\*:\* .\*\*\*\*\* \*\* \*\* \* \*\* \*\* \* .\*\* \*\* \*\* .:;\* \*\* .

H. lupulus-HL.SW.v1.0.G001325.1
L.usitatissimum-LUS10031955
Textile-hemp-csa\_locus\_16122\_iso\_2\_len\_2075\_ver\_2
Marijuana-scaffold20047

AGACAGCTGATCATGGTTGTTGATCGTAAACATCGGTCATTAAAGTTATAGCCACAAGT
AGACAGTTGATATTTGGTGGTGGTCTCGGACCGGTCGTTCAAAGTGATAGCTACCAGC
AGACAGCTGATCATGGTTGTTGATCGTAAACATCGGTCATTAAAGTTATAGCCACAAGT
AGACAGCTGATCATGGTTGTTGATCGTAAACATCGGTCATTAAAGTTATAGCCACAAGT
\*\*\*\*\* \*\* \*\*:\* .\*\*\*\*\* \*\* \*\* \* \*\* \*\* \* .\*\* \*\* \*\* .:;\* \*\* .

H. lupulus-HL.SW.v1.0.G001325.1
L.usitatissimum-LUS10031955
Textile-hemp-csa\_locus\_16122\_iso\_2\_len\_2075\_ver\_2
Marijuana-scaffold20047

GACATTTATGGTGACAAATCATTACCACCGAAGTGTATGATTCAAAGCTAAATAGTTGG
GATGTTTATGGCGATAAATCGTTGCCTACCGAAGTGTACGATTGCAAACTCAGCAGTG
GATTTTACCGTGACAAATCATTACCACCGAAGTGTATGATTCAAAGCTAAATAGTTGG
GATTTTACCGTGACAAATCATTACCACCGAAGTGTATGATTCAAAGCTAAATAGTTGG
\*\* .\*\*\*\* \*\* \*\* \* \*\* \*\* \* .\*\* \*\* \*\* .:;\* \*\* .

H. lupulus-HL.SW.v1.0.G001325.1
L.usitatissimum-LUS10031955
Textile-hemp-csa\_locus\_16122\_iso\_2\_len\_2075\_ver\_2
Marijuana-scaffold20047

TCCTTCACCAGATAATGCCAGCAGTTAATCTTTGCTCCTCAAAGATGGCTTATTGTGAC
GTTGTTTATCAGATTATGCTTCCGCTTAATCTATGCTCCTCGAAGATGGCGTATTGCCAG
TTCCCTTCACCAGATAATGCCAGCAGTTAATCTTTGCTCCTCGAAGATGGCGTATTGTGAT
TTCCCTTCACCAGATAATGCCAGCAGTTAATCTTTGCTCCTCGAAGATGGCGTATTGTGAT
\*\*\*\* \*\* \*\*:\* .\*\*\*\*\* \*\* \*\* \* \*\* \*\* \* .\*\* \*\* \*\* .:;\* \*\* .

H. lupulus-HL.SW.v1.0.G001325.1
L.usitatissimum-LUS10031955
Textile-hemp-csa\_locus\_16122\_iso\_2\_len\_2075\_ver\_2
Marijuana-scaffold20047

TCCAGGTTGATTTAGAATCTCTTTCCGCACTCGGTTGATGATGATAGACTGGACACT
TCGAGATTATACCTCGAGACTCTTTCCGCTCGGTTGATGATGATAAGCTCGACAG
TCCAGATTGATTTAGAAACCTTTCCGCACTAGGATGATGATGATAAATCGGACACT
TCCAGATTGATTTAGAAACCTTTCCGCACTAGGATGATGATGATAAATCGGACACT
\*\* \*\* \*\*.\* \*\* \*\* .: \* \*\* \*\* \* .\*\* \*\* \*\* .:\*\*\*\*\* \*\* \*\* \* \*\* \*\* \* .

H. lupulus-HL.SW.v1.0.G001325.1
L.usitatissimum-LUS10031955
Textile-hemp-csa\_locus\_16122\_iso\_2\_len\_2075\_ver\_2
Marijuana-scaffold20047

GGTTACTGGGAACACATTCATGCTAAATCCCAAGTCTTACTGGATGGCTACTTGGTT
GGTTACTGGGAGCATATTCCTGCGAAGTTCCACGGTCTCTGTTGGATGGATCTGGTG
GGATATTTGGGAACACATTCCTGCTAAATCCCAAGTCTTACTGGATGGCTACTTGGTT
GGATATTTGGGAACACATTCCTGCTAAATCCCAAGTCTTACTGGATGGCTACTTGGTT
\*\* \*\* \*\*.\* \*\* \*\* .: \* \*\* \*\* \* .\*\* \*\* \*\* .:\*\*\*\*\* \*\* \*\* \* \*\* \*\* \* .

H. lupulus-HL.SW.v1.0.G001325.1
L.usitatissimum-LUS10031955
Textile-hemp-csa\_locus\_16122\_iso\_2\_len\_2075\_ver\_2
Marijuana-scaffold20047

GCTGGCACACAGAAGCGTCTATTTTGTGGACGCATGTTCTTACAGTACTCTTCAA
GCTGGAACCCAGAAGCGTCTATTTTGTGGGAGAAATCGGCTATATAGTACGCTTCAG
GCTGGCACACAGAAGCGTCTATTTTGTGGACGCATGTTCTTATAGTACTCTTCAA
GCTGGCACACAGAAGCGTCTATTTTGTGGACGCATGTTCTTATAGTACTCTTCAA
\*\*\*\*\* \*\* \*\*:\* .\*\*\*\*\* \*\* \*\* \* \*\* \*\* \* .\*\* \*\* \*\* .:;\* \*\* .

H. lupulus-HL.SW.v1.0.G001325.1
L.usitatissimum-LUS10031955
Textile-hemp-csa\_locus\_16122\_iso\_2\_len\_2075\_ver\_2
Marijuana-scaffold20047

AGTATGAGAATTTGGGAATGGATCATGCGAAAATATGTTGGTGGAGATCAGTAGAATG
AGTATGAGGATTTGGGAGTTGGATCATGCGAAGAACTTGTGGCTAGAGATTAGTAGAATG
AGTATGAGAATTTGGGAATGGATCATGCGAAAATATGTTGGTGGAGATCAGTAGAATG
AGTATGAGGATTTGGGAGTTGGATCATGCGAAAATATGTTGGTGGAGATCAGTAGAATG
\*\*\*\*\* \*\* \*\*:\* .\*\*\*\*\* \*\* \*\* \* \*\* \*\* \* .\*\* \*\* \*\* .:;\* \*\* .

H. lupulus-HL.SW.v1.0.G001325.1
L.usitatissimum-LUS10031955
Textile-hemp-csa\_locus\_16122\_iso\_2\_len\_2075\_ver\_2
Marijuana-scaffold20047

CCACCAAGTATTTTCGAGCACTGTTAAGATATCTGCTGAGAGATTGAGTGTTTTGA
CCACCAAGTATTTTCGAGCACTGTTAAGATATCTGCTGAGAGATTGAGTGTTTTGA
CCACCAAGTATTTTCGAGCACTGTTAAGATATCTGCTGAGAGATTGAGTGTTTTGA
CCACCAAGTATTTTCGAGCACTGTTAAGATATCTGCTGAGAGATTGAGTGTTTTGA
\*\*\*\*\* \*\* \*\*:\* .\*\*\*\*\* \*\* \*\* \* \*\* \*\* \* .\*\* \*\* \*\* .:;\* \*\* .

H. lupulus-HL.SW.v1.0.G001325.1
L.usitatissimum-LUS10031955
Textile-hemp-csa\_locus\_16122\_iso\_2\_len\_2075\_ver\_2
Marijuana-scaffold20047

CAGGATAACTTAATCTGCTTTACCTCTTGGAAATCAAGGGAAGGGCTTATTGATGATG
CAGGATAACTTATGATGTTTCAATCTAGGAAACCAAGGGAAGGGCTTATTGATGATG
CAGGATAACTTATGATGTTTCAATCTAGGAAATCAAGGGAAGGGCTTATTGATGATG
CAGGATAACTTAACTGCTTTAATCTTGGAAATCAAGGGAAGGGCTTATTGATGATG
\*\*\*\*\* \*\* \*\*:\* .\*\*\*\*\* \*\* \*\* \* \*\* \*\* \* .\*\* \*\* \*\* .:;\* \*\* .

H. lupulus-HL.SW.v1.0.G001325.1
L.usitatissimum-LUS10031955
Textile-hemp-csa\_locus\_16122\_iso\_2\_len\_2075\_ver\_2
Marijuana-scaffold20047

GATAAAAAGGCTTGGCTTGGATAGGTGGATGCTGCTGCACTTACAACAGCCAGGTT
GATAAAGAGGTTGCTGCTGGATCGGAGGATGCTCTTGAATCATATAACAGCCAGGTT
GATAAAAAGTCTGGCTTGGATAGGTGGATGCTGCTGCACTTACAACAGCCAGGTT
GATAAAAAGTCTGGCTTGGATAGGTGGATGCTGCTGCACTTACAACAGCCAGGTT
\*\*\*\*\* \*\* \*\*:\* .\*\*\*\*\* \*\* \*\* \* \*\* \*\* \* .\*\* \*\* \*\* .:;\* \*\* .

H. lupulus-HL.SW.v1.0.G001325.1
L.usitatissimum-LUS10031955
Textile-hemp-csa\_locus\_16122\_iso\_2\_len\_2075\_ver\_2
Marijuana-scaffold20047

TGTTTTATGAGCCAAGATTTGATGCTTCCATCTTTAATAGGAAATTTGCTCTGCGG
TGCTTCTATGAGCTAGATTGATGCTTCAATCTATTGA-----
TGCTTTTACGAACCAAGATTTGATGCTTCCATTTGTTAATTAATTTAATG-----G
TGCTTTTACGAACCAAGATTTGATGCTTCCATTTGTTAATTAATTTAATG-----G
\*\* \*\* \*\*.\* \*\* \*\* .:\*\*\*\*\* \*\* \*\* \* \*\* \*\* \* .

H. lupulus-HL.SW.v1.0.G001325.1
L.usitatissimum-LUS10031955
Textile-hemp-csa\_locus\_16122\_iso\_2\_len\_2075\_ver\_2
Marijuana-scaffold20047

CTTCGAGTTCTATTTATGATGAGAAATTTATGAGAAGATATCATTTTCTCATGGCAT
-----
C-----CACAG-AACTATAAGAAGATATCAT-TTCACCTGGCAT
C-----CACAG-AACTATAAGAAGATATCAT-TTCACCTGGCAT

H. lupulus-HL.SW.v1.0.G001325.1
L.usitatissimum-LUS10031955
Textile-hemp-csa\_locus\_16122\_iso\_2\_len\_2075\_ver\_2
Marijuana-scaffold20047

ATTTT--TTTGGTATCAATCTTCTTTCCCACTCTGCACTTGCATCTAAGTTTTC
-----
ATTTTGTTTTGTCTCAATCTTCTTTCCCACTTTTACACATGACATCTAAGTCTTC
ATTTTGTTTTGTCTCAATCTTCTTTCCCACTTTTACACATGACATCTAAGTCTTC

H. lupulus-HL.SW.v1.0.G001325.1
L.usitatissimum-LUS10031955
Textile-hemp-csa\_locus\_16122\_iso\_2\_len\_2075\_ver\_2
Marijuana-scaffold20047

TTCATATTGAAATTTGTTAGCTAACAAATCAGATTCTT-TTCACTGTGAATCTGCTATG
-----
TTCATATTGAAATTTGTTAGCTAACAAATCAGATTCTT-TTCACTGTGAATCTGTTACATG
TTCATATTGAAATTTGTTAGCTAACAAATCAGATTCTT-TTCACTGTGAATCTGTTACATG

H. lupulus-HL.SW.v1.0.G001325.1
L.usitatissimum-LUS10031955
Textile-hemp-csa\_locus\_16122\_iso\_2\_len\_2075\_ver\_2
Marijuana-scaffold20047

AGTGATCCGAGTAAGACCTTT-TGTTAGCAGAAATTTATGACATTTACATTTGGTGGT
-----
GGGTATCCGAGTTAGACCTTTTGTGTAGCTAAATTTATTTGCGTTCAAAATTTGGTGGT
GGGTATCCGAGTTAGACCTTTTGTGTAGCTAAATTTATTTGCGTTCAAAATTTGGTGGT

H. lupulus-HL.SW.v1.0.G001325.1
L.usitatissimum-LUS10031955

GCATCAGCTTGTACCGGGCTGTGCGAGGAATGACAAGCAATGTTGTAAG----TT
-----

```

Textile-hemp-csa_locus_16122_iso_2_len_2075_ver_2
Marijuana-scaffold20047
GCATCAACTTTGTACCAGGGCTGTGCCAGGAATATGACAAGCAATGTATTGAGTTGAGTT
GCATCAACTTTGTACCAGGGCTGTGCCAGGAATATGACAAGCAATGTATTGAGTTGAGTT

H.lupulus-HL.SW.v1.0.G001325.1
L.usitatissimum-LUS10031955
Textile-hemp-csa_locus_16122_iso_2_len_2075_ver_2
Marijuana-scaffold20047
GAGTTGGGACCAAATTTGGGTCCTTTGGGTTTGTAAATAAGAATGTAGGTTGGCTGGGGAG
-----
GAGTTGAGACCAAATTTGGGTCCTTTGGGCTTGTGTAATAAATTT-----
GAGTTGAGACCAAATTTGGGTCCTTTGGGCTTGTGTAATAAATTT-----

H.lupulus-HL.SW.v1.0.G001325.1
L.usitatissimum-LUS10031955
Textile-hemp-csa_locus_16122_iso_2_len_2075_ver_2
Marijuana-scaffold20047
GAAATGTGAGAAGGCTCTTT-CTTGAAGTGTGTACACTATTTAAAAACAATTTGCACATT
-----
-AAATTTAAGAAGGCTCTTTTTTTTGAAGTGTGTACA-----ATCTGCACATT
-AAATTTAAGAAGGCTCTTTTTTTTGAAGTGTGTACA-----ATCTGCACATT

H.lupulus-HL.SW.v1.0.G001325.1
L.usitatissimum-LUS10031955
Textile-hemp-csa_locus_16122_iso_2_len_2075_ver_2
Marijuana-scaffold20047
AATATGTAATTTATAAAGTTTTGCTTTT-----
-----
AATTTGTATATCATAAAGTTTTACTTTTAAA-----
AATTTGTATATCATAAAGTTTTACTTTTATCACTATAGTAATTTTAAACTTAGTTTATG

H.lupulus-HL.SW.v1.0.G001325.1
L.usitatissimum-LUS10031955
Textile-hemp-csa_locus_16122_iso_2_len_2075_ver_2
Marijuana-scaffold20047
-----
-----
-----
TATTGCAAGTAAACTAGAGTTGATTTTTTTTTTTTTTTTTTTTGGATTAACAACACTAGAGT

H.lupulus-HL.SW.v1.0.G001325.1
L.usitatissimum-LUS10031955
Textile-hemp-csa_locus_16122_iso_2_len_2075_ver_2
Marijuana-scaffold20047
-----
-----
-----
TGATTTAAA

```

**Figure S3.** Alignment of the hemp reference genes and the orthologs from flax, hop and marijuana. The primers described in the present work are underlined and the amplified region is highlighted in yellow.
